# Supplementary material
Source: ML conference proceedings conference paper supplement (https://proceedings.mlr.press/v108/askari20a.html)
Supplement: Supplementary file 1 [file askari20a-supp.pdf]

## A Proof of Theorem 1

**Theorem 1** (Sparse Bernoulli naive Bayes). *Consider the sparse Bernoulli naive Bayes training problem (SBNB), with binary data matrix  $X \in \{0, 1\}^{n \times m}$ . The optimal values of the variables are obtained as follows. Set*

$$\begin{aligned} v &:= (f^+ + f^-) \circ \log \left( \frac{f^+ + f^-}{n} \right) + (n\mathbf{1} - f^+ - f^-) \circ \log \left( \mathbf{1} - \frac{f^+ + f^-}{n} \right), \\ w &:= w^+ + w^-, \quad w^\pm := f^\pm \circ \log \frac{f^\pm}{n_\pm} + (n_\pm \mathbf{1} - f^\pm) \circ \log \left( \mathbf{1} - \frac{f^\pm}{n_\pm} \right). \end{aligned}$$

Then identify a set  $\mathcal{I}$  of indices with the  $k$  largest elements in  $w - v$ , and set  $\theta_*^+, \theta_*^-$  according to

$$\theta_{*i}^+ = \theta_{*i}^- = \frac{1}{n}(f_i^+ + f_i^-), \quad \forall i \notin \mathcal{I}, \quad \theta_{*i}^\pm = \frac{f_i^\pm}{n_\pm}, \quad \forall i \in \mathcal{I}.$$

First note that an  $\ell_0$ -norm constraint on a  $m$ -vector  $q$  can be reformulated as

$$\|q\|_0 \leq k \iff \exists \mathcal{I} \subseteq [m], \quad |\mathcal{I}| \leq k : \quad \forall i \notin \mathcal{I}, \quad q_i = 0.$$

Hence problem (SBNB) is equivalent to

$$\max_{\theta^+, \theta^- \in [0, 1]^m, \mathcal{I}} \mathcal{L}_{\text{bnb}}(\theta^+, \theta^-; X) : \quad \theta_i^+ = \theta_i^- \quad \forall i \notin \mathcal{I}, \quad \mathcal{I} \subseteq [m], \quad |\mathcal{I}| \leq k, \quad (18)$$

where the complement of the index set  $\mathcal{I}$  encodes the indices where variables  $\theta^+, \theta^-$  agree. Then (18) becomes

$$\begin{aligned} p^* &:= \max_{\mathcal{I} \subseteq [m], |\mathcal{I}| \leq k} \sum_{i \notin \mathcal{I}} \left( \max_{\theta_i \in [0, 1]} (f_i^+ + f_i^-) \log \theta_i + (n - f_i^+ - f_i^-) \log(1 - \theta_i) \right) \\ &\quad + \sum_{i \in \mathcal{I}} \left( \max_{\theta_i^+ \in [0, 1]} f_i^+ \log \theta_i^+ + (n_+ - f_i^+) \log(1 - \theta_i^+) \right) \\ &\quad + \sum_{i \in \mathcal{I}} \left( \max_{\theta_i^- \in [0, 1]} f_i^- \log \theta_i^- + (n_- - f_i^-) \log(1 - \theta_i^-) \right). \end{aligned} \quad (19)$$

where we use the fact that  $n_+ + n_- = n$ . All the sub-problems in the above can be solved in closed-form, yielding the optimal solutions

$$\theta_{*i}^+ = \theta_{*i}^- = \frac{1}{n}(f_i^+ + f_i^-), \quad \forall i \notin \mathcal{I}, \quad \text{and} \quad \theta_{*i}^\pm = \frac{f_i^\pm}{n_\pm}, \quad \forall i \in \mathcal{I}. \quad (20)$$

Plugging the above inside the objective of (18) results in a Boolean formulation, with a Boolean vector  $u$  of cardinality  $\leq k$  such that  $\mathbf{1} - u$  encodes indices for which entries of  $\theta^+, \theta^-$  agree:

$$p^* := \max_{u \in \mathcal{C}_k} (\mathbf{1} - u)^\top v + u^\top w,$$

where, for  $k \in [m]$ :

$$\mathcal{C}_k := \{u : u \in \{0, 1\}^m, \quad \mathbf{1}^\top u \leq k\},$$

and vectors  $v, w$  are as defined in (8):

$$\begin{aligned} v &:= (f^+ + f^-) \circ \log \left( \frac{f^+ + f^-}{n} \right) + (n\mathbf{1} - f^+ - f^-) \circ \log \left( \mathbf{1} - \frac{f^+ + f^-}{n} \right), \\ w &:= w^+ + w^-, \quad w^\pm := f^\pm \circ \log \frac{f^\pm}{n_\pm} + (n_\pm \mathbf{1} - f^\pm) \circ \log \left( \mathbf{1} - \frac{f^\pm}{n_\pm} \right). \end{aligned}$$

We obtain

$$p^* = \mathbf{1}^\top v + \max_{u \in \mathcal{C}_k} u^\top (w - v) = \mathbf{1}^\top v + s_k(w - v),$$

where  $s_k(\cdot)$  denotes the sum of the  $k$  largest elements in its vector argument. Here we have exploited the fact that the map  $z := w - v \geq 0$ , which in turn implies that

$$s_k(z) = \max_{u \in \{0, 1\}^m : \mathbf{1}^\top u = k} u^\top z = \max_{u \in \mathcal{C}_k} u^\top z.$$

In order to recover an optimal pair  $(\theta_*^+, \theta_*^-)$ , we simply identify the set  $\mathcal{I}$  of indices with the  $k$  largest elements in  $w - v$ , and set  $\theta_*^+, \theta_*^-$  according to (20).

## B Proof of Theorem 2

**Theorem 2** (Sparse Multinomial Naive Bayes). *Let  $\phi(k)$  be the optimal value of (SMNB). Then  $\phi(k) \leq \psi(k)$ , where  $\psi(k)$  is the optimal value of the following one-dimensional convex optimization problem*

$$\psi(k) := C + \min_{\alpha \in [0,1]} s_k(h(\alpha)), \quad (\text{USMNB})$$

where  $C$  is a constant,  $s_k(\cdot)$  is the sum of the top  $k$  entries of its vector argument, and for  $\alpha \in (0, 1)$

$$h(\alpha) := f_+ \circ \log f_+ + f_- \circ \log f_- - (f_+ + f_-) \circ \log(f_+ + f_-) - f_+ \log \alpha - f_- \log(1 - \alpha).$$

Further, given an optimal dual variable  $\alpha_*$  that solves (USMNB), we can reconstruct a primal feasible (sub-optimal) point  $(\theta^+, \theta^-)$  for (SMNB) as follows. For  $\alpha_*$  optimal for (USMNB), let  $\mathcal{I}$  be complement of the set of indices corresponding to the top  $k$  entries of  $h(\alpha_*)$ ; then set  $B_{\pm} := \sum_{i \notin \mathcal{I}} f_i^{\pm}$ , and

$$\theta_{*i}^+ = \theta_{*i}^- = \frac{f_i^+ + f_i^-}{\mathbf{1}^\top(f^+ + f^-)}, \quad \forall i \in \mathcal{I}, \quad \theta_{*i}^{\pm} = \frac{B_{\pm} + B_{\mp}}{B_{\pm}} \frac{f_i^{\pm}}{\mathbf{1}^\top(f^+ + f^-)}, \quad \forall i \notin \mathcal{I}. \quad (21)$$

**Proof.** We begin by deriving the expression for the upper bound  $\psi(k)$ .

**Duality bound.** We first derive the bound stated in the theorem. Problem (SMNB) is written

$$(\theta_*^+, \theta_*^-) = \arg \max_{\theta^+, \theta^- \in [0,1]^m} f^{+\top} \log \theta^+ + f^{-\top} \log \theta^- : \quad \mathbf{1}^\top \theta^+ = \mathbf{1}^\top \theta^- = 1, \quad \|\theta^+ - \theta^-\|_0 \leq k. \quad (\text{SMNB})$$

By weak duality we have  $\phi(k) \leq \psi(k)$  where

$$\begin{aligned} \psi(k) := \min_{\substack{\mu^+, \mu^- \\ \lambda \geq 0}} \max_{\theta^+, \theta^- \in [0,1]^m} & f^{+\top} \log \theta^+ + f^{-\top} \log \theta^- + \mu^+(1 - \mathbf{1}^\top \theta^+) + \mu^-(1 - \mathbf{1}^\top \theta^-) \\ & + \lambda(k - \|\theta^+ - \theta^-\|_0). \end{aligned}$$

The inner maximization is separable across the components of  $\theta^+, \theta^-$  since  $\|\theta^+ - \theta^-\|_0 = \sum_{i=1}^m \mathbf{1}_{\{\theta_i^+ \neq \theta_i^-\}}$ . To solve it, we thus only need to consider one dimensional problems written

$$\max_{q, r \in [0,1]} f_i^+ \log q + f_i^- \log r - \mu^+ q - \mu^- r - \lambda \mathbb{1}_{\{q \neq r\}}, \quad (22)$$

where  $f_i^+, f_i^- > 0$  and  $\mu^{\pm} > 0$  are given. We can split the max into two cases; one case in which  $q = r$  and another when  $q \neq r$ , then compare the objective values of both solutions and take the larger one. Hence (22) becomes

$$\max \left( \max_{u \in [0,1]} (f_i^+ + f_i^-) \log u - (\mu^+ + \mu^-)u, \max_{q, r \in [0,1]} f_i^+ \log q + f_i^- \log r - \mu^+ q - \mu^- r - \lambda \right).$$

Each of the individual maximizations can be solved in closed form, with optimal point

$$u^* = \frac{(f_i^+ + f_i^-)}{\mu^+ + \mu^-}, \quad q^* = \frac{f_i^+}{\mu^+}, \quad r^* = \frac{f_i^-}{\mu^-}. \quad (23)$$

Note that none of  $u^*, q^*, r^*$  can be equal to either 0 or 1, which implies  $\mu^+, \mu^- > 0$ . Hence (22) reduces to

$$\max \left( (f_i^+ + f_i^-) \log \left( \frac{f_i^+ + f_i^-}{\mu^+ + \mu^-} \right), f_i^+ \log \left( \frac{f_i^+}{\mu^+} \right) + f_i^- \log \left( \frac{f_i^-}{\mu^-} \right) - \lambda \right) - (f_i^+ + f_i^-). \quad (24)$$

We obtain, with  $S := \mathbf{1}^\top(f^+ + f^-)$ ,

$$\psi(k) = -S + \min_{\substack{\mu^+, \mu^- > 0 \\ \lambda \geq 0}} \mu^+ + \mu^- + \lambda k + \sum_{i=1}^m \max(v_i(\mu), w_i(\mu) - \lambda). \quad (25)$$

where, for given  $\mu = (\mu^+, \mu^-) > 0$ ,

$$v(\mu) := (f^+ + f^-) \circ \log \left( \frac{f^+ + f^-}{\mu^+ + \mu^-} \right), \quad w(\mu) := f^+ \circ \log \left( \frac{f^+}{\mu^+} \right) + f^- \circ \log \left( \frac{f^-}{\mu^-} \right).$$

Recall the variational form of  $s_k(z)$ . For a given vector  $z \geq 0$ , Lemma 11 shows

$$s_k(z) = \min_{\lambda \geq 0} \lambda k + \sum_{i=1}^m \max(0, z_i - \lambda).$$

Problem (25) can thus be written

$$\begin{aligned} \psi(k) &= -S + \min_{\substack{\mu^+ > 0 \\ \mu^- > 0 \\ \lambda \geq 0}} \mu^+ + \mu^- + \lambda k + \mathbf{1}^\top v(\mu) + \sum_{i=1}^m \max(0, w_i(\mu) - v_i(\mu) - \lambda) \\ &= -S + \min_{\mu^+ > 0} \mu^+ + \mu^- + \mathbf{1}^\top v(\mu) + s_k(w(\mu) - v(\mu)), \end{aligned}$$

where the last equality follows from  $w(\mu) \geq v(\mu)$ , valid for any  $\mu > 0$ . To prove this, observe that the negative entropy function  $x \rightarrow x \log x$  is convex, implying that its perspective  $P$  also is. The latter is the function with domain  $\mathbb{R}_+ \times \mathbb{R}_{++}$ , and values for  $x \geq 0, t > 0$  given by  $P(x, t) = x \log(x/t)$ . Since  $P$  is homogeneous and convex (hence subadditive), we have, for any pair  $z_+, z_-$  in the domain of  $P$ :  $P(z_+ + z_-) \leq P(z_+) + P(z_-)$ . Applying this to  $z_\pm := (f_i^\pm, \mu_i^\pm)$  for given  $i \in [m]$  results in  $w_i(\mu) \geq v_i(\mu)$ , as claimed.

We further notice that the map  $\mu \rightarrow w(\mu) - v(\mu)$  is homogeneous, which motivates the change of variables  $\mu_\pm = t p_\pm$ , where  $t = \mu_+ + \mu_- > 0$  and  $p_\pm > 0, p_+ + p_- = 1$ . The problem reads

$$\begin{aligned} \psi(k) &= -S + (f^+ + f^-)^\top \log(f^+ + f^-) + \min_{\substack{t > 0, p > 0, \\ p_+ + p_- = 1}} \{t - S \log t + s_k(H(p))\} \\ &= C + \min_{p > 0, p_+ + p_- = 1} s_k(H(p)), \end{aligned}$$

where  $C := (f^+ + f^-)^\top \log(f^+ + f^-) - S \log S$ , because  $t = S$  at the optimum, and

$$H(p) := v - f^+ \circ \log p_+ - f^- \circ \log p_-,$$

with

$$v = f^+ \circ \log f^+ + f^- \circ \log f^- - (f^+ + f^-) \circ \log(f^+ + f^-).$$

Solving for  $\psi(k)$  thus reduces to a 1D bisection

$$\psi(k) = C + \min_{\alpha \in [0, 1]} s_k(h(\alpha)),$$

where

$$h(\alpha) := H(\alpha, 1 - \alpha) = v - f^+ \log \alpha - f^- \log(1 - \alpha).$$

This establishes the first part of the theorem. Note that it is straightforward to check that with  $k = n$ , the bound is exact:  $\phi(n) = \psi(n)$ .

**Primalization.** Next we focus on recovering a primal feasible (sub-optimal) point  $(\theta^{+\text{sub}}, \theta^{-\text{sub}})$  from the dual bound obtained before. Assume that  $\alpha_*$  is optimal for the dual problem (USMNB). We sort the vector  $h(\alpha_*)$  and find the indices corresponding to the top  $k$  entries. Denote the complement of this set of indices by  $\mathcal{I}$ . These indices are then the candidates for which  $\theta_i^+ = \theta_i^-$  for  $i \in \mathcal{I}$  in the primal problem to eliminate the cardinality constraint. Hence we are left with solving

$$\begin{aligned} (\theta^{+\text{sub}}, \theta^{-\text{sub}}) &= \arg \max_{\theta^+, \theta^- \in [0, 1]^m} f^{+\top} \log \theta^+ + f^{-\top} \log \theta^- \\ \text{s.t. } \mathbf{1}^\top \theta^+ &= \mathbf{1}^\top \theta^- = 1, \\ \theta_i^+ &= \theta_i^-, \quad i \in \mathcal{I} \end{aligned} \tag{26}$$

or, equivalently

$$\begin{aligned} \max_{\theta, \theta^+, \theta^-, s \in [0,1]} & \sum_{i \in \mathcal{I}} (f_i^+ + f_i^-) \log \theta_i + \sum_{i \notin \mathcal{I}} (f_i^+ \log \theta_i^+ + f_i^- \log \theta_i^-) \\ \text{s.t. } & \mathbf{1}^\top \theta^+ = \mathbf{1}^\top \theta^- = 1 - s, \quad \mathbf{1}^\top \theta = s. \end{aligned} \quad (27)$$

For given  $\kappa \in [0, 1]$ , and  $f \in \mathbb{R}_{++}^m$ , we have

$$\max_{u : \mathbf{1}^\top u = \kappa} f^\top \log(u) = f^\top \log f - (\mathbf{1}^\top f) \log(\mathbf{1}^\top f) + (\mathbf{1}^\top f) \log \kappa,$$

with optimal point given by  $u^* = (\kappa/(\mathbf{1}^\top f))f$ . Applying this to problem (27), we obtain that the optimal value of  $s$  is given by

$$s^* = \arg \max_{s \in (0,1)} \{A \log s + B \log(1 - s)\} = \frac{A}{A + B},$$

where

$$A := \sum_{i \in \mathcal{I}} (f_i^+ + f_i^-), \quad B_\pm := \sum_{i \notin \mathcal{I}} f_i^\pm, \quad B := B_+ + B_- = \mathbf{1}^\top (f^+ + f^-) - A.$$

We obtain

$$\theta_i^{+\text{sub}} = \theta_i^{-\text{sub}} = \frac{s^*}{A} (f_i^+ + f_i^-), \quad i \in \mathcal{I}, \quad \theta_i^{\pm\text{sub}} = \frac{(1 - s^*)}{B_\pm (A + B)} f_i^\pm, \quad i \notin \mathcal{I},$$

which further reduces to the expression stated in the theorem. ■

## C Proof of Theorem 3

The proof follows from results by (Aubin and Ekeland, 1976) (see also (Ekeland and Temam, 1999; Kerdreux et al., 2017) for a more recent discussion) which are briefly summarized below for the sake of completeness. Given functions  $f_i$ , a vector  $b \in \mathbb{R}^m$ , and vector-valued functions  $g_i$ ,  $i \in [n]$  that take values in  $\mathbb{R}^m$ , we consider the following problem:

$$h_P(u) := \min_x \sum_{i=1}^n f_i(x_i) : \sum_{i=1}^n g_i(x_i) \leq b + u \quad (\text{P})$$

in the variables  $x_i \in \mathbb{R}^{d_i}$ , with perturbation parameter  $u \in \mathbb{R}^m$ . We first recall some basic results about conjugate functions and convex envelopes.

**Biconjugate and convex envelope.** Given a function  $f$ , not identically  $+\infty$ , minorized by an affine function, we write

$$f^*(y) \triangleq \inf_{x \in \text{dom } f} \{y^\top x - f(x)\}$$

the conjugate of  $f$ , and  $f^{**}(y)$  its biconjugate. The biconjugate of  $f$  (aka the convex envelope of  $f$ ) is the pointwise supremum of all affine functions majorized by  $f$  (see e.g. (Rockafellar, 1970, Th. 12.1) or (Hiriart-Urruty and Lemaréchal, 1993, Th. X.1.3.5)), a corollary then shows that  $\text{epi}(f^{**}) = \overline{\text{Co}}(\text{epi}(f))$ . For simplicity, we write  $S^{**} = \overline{\text{Co}}(S)$  for any set  $S$  in what follows. We will make the following technical assumptions on the functions  $f_i$  and  $g_i$  in our problem.

**Assumption 3.** *The functions  $f_i : \mathbb{R}^{d_i} \rightarrow \mathbb{R}$  are proper, 1-coercive, lower semicontinuous and there exists an affine function minorizing them.*

Note that coercivity trivially holds if  $\text{dom}(f_i)$  is compact (since  $f$  can be set to  $+\infty$  outside w.l.o.g.). When Assumption 3 holds,  $\text{epi}(f^{**})$ ,  $f_i^{**}$  and hence  $\sum_{i=1}^n f_i^{**}(x_i)$  are closed (Hiriart-Urruty and Lemaréchal, 1993, Lem. X.1.5.3). Also, as in e.g. (Ekeland and Temam, 1999), we define the lack of convexity of a function as follows.

**Definition 4.** *Let  $f : \mathbb{R}^d \rightarrow \mathbb{R}$ , we let*

$$\rho(f) \triangleq \sup_{x \in \text{dom}(f)} \{f(x) - f^{**}(x)\} \quad (28)$$

Many other quantities measure lack of convexity (see e.g. (Aubin and Ekeland, 1976; Bertsekas, 2014) for further examples). In particular, the nonconvexity measure  $\rho(f)$  can be rewritten as

$$\rho(f) = \sup_{\substack{x_i \in \text{dom}(f) \\ \mu \in \mathbb{R}^{d+1}}} \left\{ f \left( \sum_{i=1}^{d+1} \mu_i x_i \right) - \sum_{i=1}^{d+1} \mu_i f(x_i) : \mathbf{1}^\top \mu = 1, \mu \geq 0 \right\} \quad (29)$$

when  $f$  satisfies Assumption 3 (see (Hiriart-Urruty and Lemaréchal, 1993, Th. X.1.5.4)).

**Bounds on the duality gap and the Shapley-Folkman Theorem** Let  $h_P(u)^{**}$  be the biconjugate of  $h_P(u)$  defined in (P), then  $h_P(0)^{**}$  is the optimal value of the dual to (P) (Ekeland and Temam, 1999, Lem. 2.3), and (Ekeland and Temam, 1999, Th. I.3) shows the following result.

**Theorem 5.** Suppose the functions  $f_i, g_{ji}$  in problem (P) satisfy Assumption 3 for  $i = 1, \dots, n$ ,  $j = 1, \dots, m$ . Let

$$\bar{p}_j = (m+1) \max_i \rho(g_{ji}), \quad \text{for } j = 1, \dots, m \quad (30)$$

then

$$h_P(\bar{p}) \leq h_P(0)^{**} + (m+1) \max_i \rho(f_i). \quad (31)$$

where  $\rho(\cdot)$  is defined in Def. 4.

We are now ready to prove Theorem 3, whose proof follows from Theorem 5 above.

**Theorem 6** (Quality of Sparse Multinomial Naive Bayes Relaxation). Let  $\phi(k)$  be the optimal value of (SMNB) and  $\psi(k)$  that of the convex relaxation in (USMNB), we have for  $k \geq 4$ ,

$$\psi(k-4) \leq \phi(k) \leq \psi(k) \leq \phi(k+4).$$

for  $k \geq 4$ .

**Proof.** Problem (SMNB) is *separable* and can be written in perturbation form as in the result by (Ekeland and Temam, 1999, Th. I.3) recalled in Theorem 5, to get

$$\begin{aligned} h_P(u) = & \min_{q,r} \quad -f^\top \log q - f^\top \log r \\ \text{subject to} & \quad \mathbf{1}^\top q = 1 + u_1, \\ & \quad \mathbf{1}^\top r = 1 + u_2, \\ & \quad \sum_{i=1}^m \mathbf{1}_{q_i \neq r_i} \leq k + u_3 \end{aligned} \quad (32)$$

in the variables  $q, r \in [0, 1]^m$ , where  $u \in \mathbb{R}^3$  is a perturbation vector. By construction, we have  $\phi(k) = -h_P(0)$  and  $\phi(k+l) = -h_P((0, 0, l))$ . Note that the functions  $\mathbf{1}_{q_i \neq r_i}$  are lower semicontinuous and, because the domain of problem (SMNB) is compact, the functions

$$f_i^+ \log q_i + q_i + f_i^- \log r_i + r_i + \mathbf{1}_{q_i \neq r_i}$$

are 1-coercive for  $i = 1, \dots, m$  on the domain and satisfy Assumption 3 above.

Now, because  $q, r \geq 0$  with  $\mathbf{1}^\top q = \mathbf{1}^\top r = 1$ , we have  $q - r \in [-1, 1]^m$  and the convex envelope of  $\mathbf{1}_{q_i \neq r_i}$  on  $q, r \in [0, 1]^m$  is  $|q_i - r_i|$ , hence the *lack of convexity* (29) of  $\mathbf{1}_{q_i \neq r_i}$  on  $[0, 1]^2$  is bounded by one, because

$$\rho(\mathbf{1}_{x \neq y}) := \sup_{x, y \in [0, 1]} \{ \mathbf{1}_{y \neq x} - |x - y| \} = 1$$

which means that  $\max_{i=1, \dots, n} \rho(g_{3i}) = 1$  in the statement of Theorem 5. The fact that the first two constraints in problem (32) are convex means that  $\max_{i=1, \dots, n} \rho(g_{ji}) = 0$  for  $j = 1, 2$ , and the perturbation vector in (30) is given by  $\bar{p} = (0, 0, 4)$ , because there are three constraints in problem (32) so  $m = 3$  in (30), hence

$$h_P(\bar{p}) = h_P((0, 0, 4)) = -\phi(k+4).$$

The objective function being convex separable, we have  $\max_{i=1, \dots, n} \rho(f_i) = 0$ . Theorem 5 then states that

$$h_P(\bar{p}) = h_P((0, 0, 4)) = -\phi(k+4) \leq h_P(0)^{**} + 0 = -\psi(k)$$

because  $-h_P(0)^{**}$  is the optimal value of the dual to  $\phi(k)$  which is here  $\psi(k)$  defined in Theorem 2. The other bound in (15), namely  $\phi(k) \leq \psi(k)$ , follows directly from weak duality. ■

**Primalization.** We first derive the second dual of problem (P), i.e. the dual of problem (USMNB), which will be used to extract good primal solutions.

**Proposition 7.** *A dual of problem (USMNB) is written*

$$\begin{aligned}
 \max. \quad & z^\top (g \circ \log(g)) + x^\top (f^+ \circ \log(f^+) + f^- \circ \log(f^-)) + (x^\top g) \log(x^\top g) - (x^\top g) \\
 & - (\mathbf{1}^\top g) \log(\mathbf{1}^\top g) - (x^\top f^+) \log(x^\top f^+) - (x^\top f^-) \log(x^\top f^-) \\
 \text{s.t.} \quad & x + z = \mathbf{1}, \quad \mathbf{1}^\top x \leq k, \quad x \geq 0, \quad z \geq 0
 \end{aligned} \tag{D}$$

in the variables  $x, z \in \mathbb{R}^n$ . Furthermore, strong duality holds between the dual (USMNB) and its dual (D).

**Proof.** The dual optimum value  $\psi(k)$  in (USMNB) can be written as in (25),

$$\psi(k) = -S + \min_{\substack{\mu^+, \mu^- > 0 \\ \lambda \geq 0}} \mu^+ + \mu^- + \lambda k + \sum_{i=1}^m \max(v_i(\mu), w_i(\mu) - \lambda).$$

with  $S := \mathbf{1}^\top (f^+ + f^-)$ , and

$$v(\mu) := (f^+ + f^-) \circ \log\left(\frac{f^+ + f^-}{\mu^+ + \mu^-}\right), \quad w(\mu) := f^+ \circ \log\left(\frac{f^+}{\mu^+}\right) + f^- \circ \log\left(\frac{f^-}{\mu^-}\right).$$

for given  $\mu = (\mu^+, \mu^-) > 0$ . This can be rewritten

$$\min_{\substack{\mu^+, \mu^- > 0 \\ \lambda \geq 0}} \max_{\substack{x+z=\mathbf{1} \\ x, z \geq 0}} \mu^+ + \mu^- - S + \lambda(k - \mathbf{1}^\top x) + z^\top v(\mu) + x^\top w(\mu)$$

using additional variables  $x, z \in \mathbb{R}^n$ , or again

$$\min_{\substack{\mu^+, \mu^- > 0 \\ \lambda \geq 0}} \max_{\substack{x+z=\mathbf{1} \\ x, z \geq 0}} \lambda(k - \mathbf{1}^\top x) - (x+z)^\top g - (z^\top g) \log(\mu^+ + \mu^-) + z^\top (g \circ \log(g)) \\ - (x^\top f^+) \log(\mu^+) - (x^\top f^-) \log(\mu^-) \\ + x^\top (f^+ \circ \log(f^+) + f^- \circ \log(f^-)) + \mu^+ + \mu^- \tag{33}$$

calling  $g = f^+ + f^-$ . Strong duality holds in this min max problem so we can switch the min and the max. Writing  $\mu_\pm = t p_\pm$ , where  $t = \mu_+ + \mu_-$  and  $p_\pm > 0$ ,  $p_+ + p_- = 1$  the Lagrangian becomes

$$\begin{aligned}
 L(p_+, p_-, t, \lambda, x, z, \alpha) = & \mathbf{1}^\top \nu - z^\top \nu - x^\top \nu + \lambda k - \lambda \mathbf{1}^\top x - \mathbf{1}^\top g - (z^\top g) \log(t) \\
 & - (x^\top f^+) \log(t p_+) - (x^\top f^-) \log(t p_-) + t \\
 & + z^\top (g \circ \log(g)) + x^\top (f^+ \circ \log(f^+) + f^- \circ \log(f^-)) \\
 & + \alpha(p_+ + p_- - 1),
 \end{aligned}$$

where  $\alpha$  is the dual variable associated with the constraint  $p_+ + p_- = 1$ . The dual of problem (USMNB) is then written

$$\sup_{\{x \geq 0, z \geq 0, \alpha\}} \inf_{\substack{p_+ \geq 0, p_- \geq 0, \\ t \geq 0, \lambda \geq 0}} L(p_+, p_-, t, \mu^-, \lambda, x, z, \alpha)$$

The inner infimum will be  $-\infty$  unless  $\mathbf{1}^\top x \leq k$ , so the dual becomes

$$\sup_{\substack{x+z=\mathbf{1}, \mathbf{1}^\top x \leq k, \\ x \geq 0, z \geq 0, \alpha}} \inf_{\substack{p_+ \geq 0, p_- \geq 0, \\ t \geq 0}} \begin{aligned} & z^\top (g \circ \log(g)) + x^\top (f^+ \circ \log(f^+) + f^- \circ \log(f^-)) \\ & - (x^\top f^+) (\log t + \log(p_+)) - (x^\top f^-) (\log t + \log(p_-)) \\ & + t - \mathbf{1}^\top g - (z^\top g) \log(t) + \alpha(p_+ + p_- - 1) \end{aligned}$$

and the first order optimality conditions in  $t, p_+, p_-$  yield

$$\begin{aligned}
 t &= \mathbf{1}^\top g \\
 p_+ &= (x^\top f^+)/\alpha \\
 p_- &= (x^\top f^-)/\alpha
 \end{aligned} \tag{34}$$

which means the above problem reduces to

$$\sup_{\substack{x+z=\mathbf{1}, \mathbf{1}^\top x \leq k, \\ x \geq 0, z \geq 0, \alpha}} z^\top (g \circ \log(g)) + x^\top (f^+ \circ \log(f^+) + f^- \circ \log(f^-)) \\ - (\mathbf{1}^\top g) \log(\mathbf{1}^\top g) - (x^\top f^+) \log(x^\top f^+) - (x^\top f^-) \log(x^\top f^-) \\ + (x^\top g) \log \alpha - \alpha$$

and setting in  $\alpha = x^\top g$  leads to the dual in (D). ■

We now use this last result to better characterize scenarios where the bound produced by problem (USMNB) is tight and recovers an optimal solution to problem (SMNB).

**Proposition 8.** *Given  $k > 0$ , let  $\phi(k)$  be the optimal value of (SMNB). Given an optimal solution  $(x, z)$  of problem (D), let  $J = \{i : x_i \notin \{0, 1\}\}$  be the set of indices where  $x_i, z_i$  are not binary in  $\{0, 1\}$ . There is a feasible point  $\bar{\theta}, \bar{\theta}^+, \bar{\theta}^-$  of problem (SMNB) for  $\bar{k} = k + |J|$ , with objective value  $OPT$  such that*

$$\phi(k) \leq OPT \leq \phi(k + |J|).$$

**Proof.** Using the fact that

$$\max_x a \log(x) - bx = a \log\left(\frac{a}{b}\right) - a$$

the max min problem in (33) can be rewritten as

$$\max_{\substack{x+z=\mathbf{1} \\ x, z \geq 0}} \min_{\substack{\mu^+, \mu^- > 0 \\ \lambda \geq 0}} \max_{\theta, \theta^+, \theta^-} \lambda(k - \mathbf{1}^\top x) + z^\top (g \circ \log \theta) \\ + x^\top (f^+ \circ \log \theta^+) + x^\top (f^- \circ \log \theta^-) \\ + \mu^+(1 - z^\top \theta - x^\top \theta^+) + \mu^-(1 - z^\top \theta - x^\top \theta^-) \quad (35)$$

in the additional variables  $\theta, \theta^+, \theta^- \in \mathbb{R}^n$ , with (23) showing that

$$\theta_i = \frac{(f_i^+ + f_i^-)}{\mu^+ + \mu^-}, \quad \theta_i^+ = \frac{f_i^+}{\mu^+}, \quad \theta_i^- = \frac{f_i^-}{\mu^-}.$$

at the optimum. Strong duality holds in the inner min max, which means we can also rewrite problem (D) as

$$\max_{\substack{x+z=\mathbf{1} \\ x, z \geq 0}} \max_{\substack{z^\top \theta + x^\top \theta^+ \leq 1 \\ z^\top \theta + x^\top \theta^- \leq 1 \\ x^\top \mathbf{1} \leq k}} z^\top (g \circ \log \theta) + x^\top (f^+ \circ \log \theta^+ + f^- \circ \log \theta^-) \quad (36)$$

or again, in epigraph form

$$\max. \quad r \\ \text{s.t.} \quad \begin{pmatrix} r \\ 1 \\ 1 \\ k \end{pmatrix} \in \begin{pmatrix} 0 \\ \mathbb{R}_+ \\ \mathbb{R}_+ \\ \mathbb{R}_+ \end{pmatrix} + \sum_{i=1}^n \left\{ z_i \begin{pmatrix} g_i \log \theta_i \\ \theta_i \\ \theta_i \\ 0 \end{pmatrix} + x_i \begin{pmatrix} f_i^+ \log \theta_i^+ + f_i^- \log \theta_i^- \\ \theta_i^+ \\ \theta_i^- \\ 1 \end{pmatrix} \right\} \quad (37)$$

Suppose the optimal solutions  $x^*, z^*$  of problem (D) are binary in  $\{0, 1\}^n$  and let  $\mathcal{I} = \{i : z_i = 0\}$ , then problem (hence problem (D)) reads

$$(\theta^{+\text{sub}}, \theta^{-\text{sub}}) = \arg \max_{\theta^+, \theta^- \in [0, 1]^m} f^{+\top} \log \theta^+ + f^{-\top} \log \theta^- \quad (38) \\ \text{s.t. } \mathbf{1}^\top \theta^+ = \mathbf{1}^\top \theta^- = 1, \\ \theta_i^+ = \theta_i^-, \quad i \in \mathcal{I}.$$

which is exactly (38). This means that the optimal values of problem (38) and (D) are equal, so that the relaxation is tight and  $\theta_i^+ = \theta_i^-$  for  $i \in \mathcal{I}$ . Suppose now that some coefficients  $x_i$  are not binary. Let us call  $J$  the set  $J = \{i : x_i \notin \{0, 1\}\}$ . As in (Ekeland and Temam, 1999, Th. I.3), we define new solutions  $\bar{\theta}, \bar{\theta}^+, \bar{\theta}^-$  and  $\bar{x}, \bar{z}$  as follows,

$$\begin{cases} \bar{\theta}_i = \theta_i, \bar{\theta}_i^+ = \theta_i^+, \bar{\theta}_i^- = \theta_i^- \text{ and } \bar{z}_i = z_i, \bar{x}_i = x_i & \text{if } i \notin J \\ \bar{\theta}_i = 0, \bar{\theta}_i^+ = z_i \theta + x_i \theta_i^+, \bar{\theta}_i^- = z_i \theta + x_i \theta_i^- \text{ and } \bar{z}_i = 0, \bar{x}_i = 1 & \text{if } i \in J \end{cases}$$

By construction, the points  $\bar{\theta}, \bar{\theta}^+, \bar{\theta}^-$  and  $\bar{z}, \bar{x}$  satisfy the constraints  $\bar{z}^\top \bar{\theta} + \bar{x}^\top \bar{\theta}^+ \leq 1$ ,  $\bar{z}^\top \bar{\theta} + \bar{x}^\top \bar{\theta}^- \leq 1$  and  $\bar{x}^\top \mathbf{1} \leq k$ . We also have  $\bar{x}^\top \leq k + |J|$  and

$$\begin{aligned} & z^\top ((f^+ + f^-) \circ \log \theta) + x^\top (f^+ \circ \log \theta^+ + f^- \circ \log \theta^-) \\ & \leq \bar{z}^\top ((f^+ + f^-) \circ \log \bar{\theta}) + \bar{x}^\top (f^+ \circ \log \bar{\theta}^+ + f^- \circ \log \bar{\theta}^-) \end{aligned}$$

by concavity of the objective, hence the last inequality. ■

We will now use the Shapley-Folkman theorem to bound the number of nonbinary coefficients in Proposition 7 and construct a solution to (D) satisfying the bound in Theorem 3.

**Proposition 9.** *There is a solution to problem (D) with at most four nonbinary pairs  $(x_i, z_i)$ .*

**Proof.** Suppose  $(x^*, z^*, r^*)$  and  $(\theta, \theta_i^+, \theta_i^-)$  solve problem (D) written as in (C), we get

$$\begin{pmatrix} r^* \\ 1 - s_1 \\ 1 - s_2 \\ k - s_3 \end{pmatrix} = \sum_{i=1}^n \left\{ z_i \begin{pmatrix} g_i \log \theta_i \\ \theta_i \\ \theta_i \\ 0 \end{pmatrix} + x_i \begin{pmatrix} f_i^+ \log \theta_i^+ + f_i^- \log \theta_i^- \\ \theta_i^+ \\ \theta_i^- \\ 1 \end{pmatrix} \right\} \quad (39)$$

where  $s_1, s_2, s_3 \geq 0$ . This means that the point  $(r^*, 1 - s_1, 1 - s_2, k - s_3)$  belongs to a Minkowski sum of segments, with

$$\begin{pmatrix} r^* \\ 1 - s_1 \\ 1 - s_2 \\ k - s_3 \end{pmatrix} \in \sum_{i=1}^n \text{Co} \left( \left\{ \begin{pmatrix} g_i \log \theta_i \\ \theta_i \\ \theta_i \\ 0 \end{pmatrix}, \begin{pmatrix} f_i^+ \log \theta_i^+ + f_i^- \log \theta_i^- \\ \theta_i^+ \\ \theta_i^- \\ 1 \end{pmatrix} \right\} \right) \quad (40)$$

The Shapley-Folkman theorem (Starr, 1969) then shows that

$$\begin{aligned} \begin{pmatrix} r^* \\ 1 - s_1 \\ 1 - s_2 \\ k - s_3 \end{pmatrix} & \in \sum_{[1,n] \setminus \mathcal{S}} \left\{ \begin{pmatrix} g_i \log \theta_i \\ \theta_i \\ \theta_i \\ 0 \end{pmatrix}, \begin{pmatrix} f_i^+ \log \theta_i^+ + f_i^- \log \theta_i^- \\ \theta_i^+ \\ \theta_i^- \\ 1 \end{pmatrix} \right\} \\ & + \sum_{\mathcal{S}} \text{Co} \left( \left\{ \begin{pmatrix} g_i \log \theta_i \\ \theta_i \\ \theta_i \\ 0 \end{pmatrix}, \begin{pmatrix} f_i^+ \log \theta_i^+ + f_i^- \log \theta_i^- \\ \theta_i^+ \\ \theta_i^- \\ 1 \end{pmatrix} \right\} \right) \end{aligned}$$

where  $|\mathcal{S}| \leq 4$ , which means that there exists a solution to (D) with at most four nonbinary pairs  $(x_i, z_i)$  with indices  $i \in \mathcal{S}$ . ■

In our case, since the Minkowski sum in (40) is a polytope (as a Minkowski sum of segments), the Shapley-Folkman result reduces to a direct application of the fundamental theorem of linear programming, which allows us to reconstruct the solution of Proposition 9 by solving a linear program.

**Proposition 10.** *Given  $(x^*, z^*, r^*)$  and  $(\theta, \theta_i^+, \theta_i^-)$  solving problem (D), we can reconstruct a solution  $(x, z)$  solving problem (7), such that at most four pairs  $(x_i, z_i)$  are nonbinary, by solving*

$$\begin{aligned} \min. \quad & c^\top x \\ \text{s.t.} \quad & \sum_{i=1}^n (1 - x_i) g_i \log \theta_i + x_i (f_i^+ \log \theta_i^+ + f_i^- \log \theta_i^-) = r^* \\ & \sum_{i=1}^n (1 - x_i) \theta_i + x_i \theta_i^+ \leq 1 \\ & \sum_{i=1}^n (1 - x_i) \theta_i + x_i \theta_i^- \leq 1 \\ & \sum_{i=1}^n x_i \leq k \\ & 0 \leq x \leq 1 \end{aligned} \quad (41)$$

which is a linear program in the variable  $x \in \mathbb{R}^n$  where  $c \in \mathbb{R}^n$  is e.g. a i.i.d. Gaussian vector.



**Proof.** Given  $(x^*, z^*, r^*)$  and  $(\theta, \theta_i^+, \theta_i^-)$  solving problem (D), we can reconstruct a solution  $(x, z)$  solving problem (7), by solving (41) which is a linear program in the variable  $x \in \mathbb{R}^n$  where  $c \in \mathbb{R}^n$  is e.g. a i.i.d. Gaussian vector. This program has  $2n + 4$  constraints, at least  $n$  of which will be saturated at the optimum. In particular, at least  $n - 4$  constraints in  $0 \leq x \leq 1$  will be saturated so at least  $n - 4$  coefficients  $x_i$  will be binary at the optimum, idem for the corresponding coefficients  $z_i = 1 - x_i$ . ■

Proposition 10 shows that solving the linear program in (41) as a postprocessing step will produce a solution to problem (D) with at most  $n - 4$  nonbinary coefficient pairs  $(x_i, z_i)$ . Proposition 8 then shows that this solution satisfies

$$\phi(k) \leq OPT \leq \phi(k + 4).$$

which is the bound in Theorem (3).

Finally, we show a technical lemma linking the dual solution  $(x, z)$  in (D) above and the support of the  $k$  largest coefficients in the computation of  $s_k(h(\alpha))$  in theorem 2.

**Lemma 11.** *Given  $c \in \mathbb{R}_+^n$ , we have*

$$s_k(c) = \min_{\lambda \geq 0} \lambda k + \sum_{i=1}^n \max(0, c_i - \lambda) \quad (42)$$

and given  $k, \lambda \in [c_{[k+1]}, c_{[k]}]$  at the optimum, where  $c_{[1]} \geq \dots \geq c_{[n]}$ . Its dual is written

$$\begin{aligned} \max. \quad & x^\top c \\ \text{s.t.} \quad & \mathbf{1}^\top x \leq k \\ & x + z = 1 \\ & 0 \leq z, x \end{aligned} \quad (43)$$

When all coefficients  $c_i$  are distinct, the optimum solutions  $x, z$  of the dual have at most one nonbinary coefficient each, i.e.  $x_i, z_i \in (0, 1)$  for a single  $i \in [1, n]$ . If in addition  $c_{[k]} > 0$ , the solution to (43) is binary.

**Proof.** Problem (42) can be written

$$\begin{aligned} \min. \quad & \lambda k + \mathbf{1}^\top t \\ \text{s.t.} \quad & c - \lambda \mathbf{1} \leq t \\ & 0 \leq t \end{aligned}$$

and its Lagrangian is then

$$L(\lambda, t, z, x) = \lambda k + \mathbf{1}^\top t + x^\top (c - \lambda \mathbf{1} - t) + z^\top t.$$

The dual to the minimization problem (42) reads

$$\begin{aligned} \max. \quad & x^\top c \\ \text{s.t.} \quad & \mathbf{1}^\top x \leq k \\ & x + z = 1 \\ & 0 \leq z, x \end{aligned}$$

in the variable  $w \in \mathbb{R}^n$ , its optimum value is  $s_k(z)$ . By construction, given  $\lambda \in [c_{[k+1]}, c_{[k]}]$ , only the  $k$  largest terms in  $\sum_{i=1}^n \max(0, c_i - \lambda)$  are nonzero, and they sum to  $s_k(c) - k\lambda$ . The KKT optimality conditions impose

$$x_i(c_i - \lambda - t_i) = 0 \quad \text{and} \quad z_i t_i = 0, \quad i = 1, \dots, n$$

at the optimum. This, together with  $x + z = 1$  and  $t, x, z \geq 0$ , means in particular that

$$\begin{cases} x_i = 0, z_i = 1, & \text{if } c_i - \lambda < 0 \\ x_i = 0, z_i = 1, \text{ or } x_i = 1, z_i = 0 & \text{if } c_i - \lambda > 0 \end{cases} \quad (44)$$

the result of the second line comes from the fact that if  $c_i - \lambda > 0$  and  $t_i = c_i - \lambda$  then  $z_i = 0$  hence  $x_i = 1$ , if on the other hand  $t_i \neq c_i - \lambda$ , then  $x_i = 0$  hence  $z_i = 1$ . When the coefficients  $c_i$  are all distinct,  $c_i - \lambda = 0$  for at most a single index  $i$  and (44) yields the desired result. When  $c_{[k]} > 0$  and the  $c_i$  are all distinct, then the only way to enforce zero gap, i.e.

$$x^\top c = s_k(c)$$

is to set the corresponding coefficients of  $x_i$  to one. ■

## D Details on Datasets

This section details the data sets used in our experiments.

### Downloading data sets.

1. AMZN The complete Amazon reviews data set was collected from [here](#); only a subset of this data was used which can be found [here](#). This data set was randomly split into 80/20 train/test.
2. IMDB The large movie review (or IMDB) data set was collected from [here](#) and was already split 50/50 into train/test.
3. TWTR The Twitter Sentiment140 data set was downloaded from [here](#) and was pre-processed according to the method highlighted [here](#).
4. MPQA The MPQA opinion corpus can be found [here](#) and was pre-processed using the code found [here](#).
5. SST2 The Stanford Sentiment Treebank data set was downloaded from [here](#) and the pre-processing code can be found [here](#).

**Creating feature vectors.** After all data sets were downloaded and pre-processed, the different types of feature vectors were constructed using `CounterVectorizer` and `TfidfVectorizer` from Sklearn (Pedregosa et al., 2011). Counter vector, tf-idf, and tf-idf word bigrams use the `analyzer = ‘word’` specification while the tf-idf char bigrams use `analyzer = ‘char’`.

**Two-stage procedures.** For experiments 2 and 3, all standard models were trained in Sklearn (Pedregosa et al., 2011). In particular, the following settings were used in stage 2 for each model

1. `LogisticRegression(penalty=‘l2’, solver=‘lbfgs’, C =1e4, max_iter=1e2)`
2. `LinearSVC(C = 1e4)`
3. `MultinomialNB(alpha=a)`

In the first stage of the two stage procedures, the following settings were used for each of the different feature selection methods

1. `LogisticRegression(random_state=0, C =  $\lambda_1$ , penalty=‘l1’, solver=‘saga’, max_iter=1e2)`
2. `clf = LogisticRegression(C = 1e4, penalty=‘l2’, solver = ‘lbfgs’, max_iter = 1e2).fit(train_x, train_y)`  
`selector_log = RFE(clf, k), step=0.3)`
3. `Lasso(alpha =  $\lambda_2$ , selection=‘cyclic’, tol = 1e-5)`
4. `LinearSVC(C =  $\lambda_3$ , penalty=‘l1’, dual=False)`
5. `clf = LinearSVC(C = 1e4, penalty=‘l2’, dual=False).fit(train_x, train_y)`  
`selector_svm = RFE(clf, k, step=0.3)`
6. `MultinomialNB(alpha=a)`

where  $\lambda_i$  are hyper-parameters used by the  $\ell_1$  methods to achieve a desired sparsity level  $k$ .  $a$  is a hyper-parameter for the different MNB models which we compute using cross validation (explained below).

**Hyper-parameters.** For each of the  $\ell_1$  methods we manually do a grid search over all hyper-parameters to achieve an approximate desired sparsity pattern. For determining the hyper-parameter for the MNB models, we employ 10-fold cross validation on each data set for each type of feature vector and determine the best value of  $a$ . In total, this is  $16 + 20 = 36$  values of  $a$  – 16 for experiment 2 and 20 for experiment 3. In experiment 2, we do not use the twitter data set since computing the  $\lambda_i$ ’s to achieve a desired sparsity pattern for the  $\ell_1$  based feature selection methods was computationally intractable.

**Experiment 2 and 3: full results.** Here we show the results of experiments 2 and 3 for all the data sets. All error bars represents 10 separate simulations where each simulation is a different appropriately-sized train-test split (as per Table 1). As seen in Figure 1, the SVM- $\ell_1$  model was unable to converge and hence has an accuracy of 50%. This was in spite of manually adjusting `max_iter=1e7` and using the liblinear solver which is default for LinearSVC in sci-kit learn.

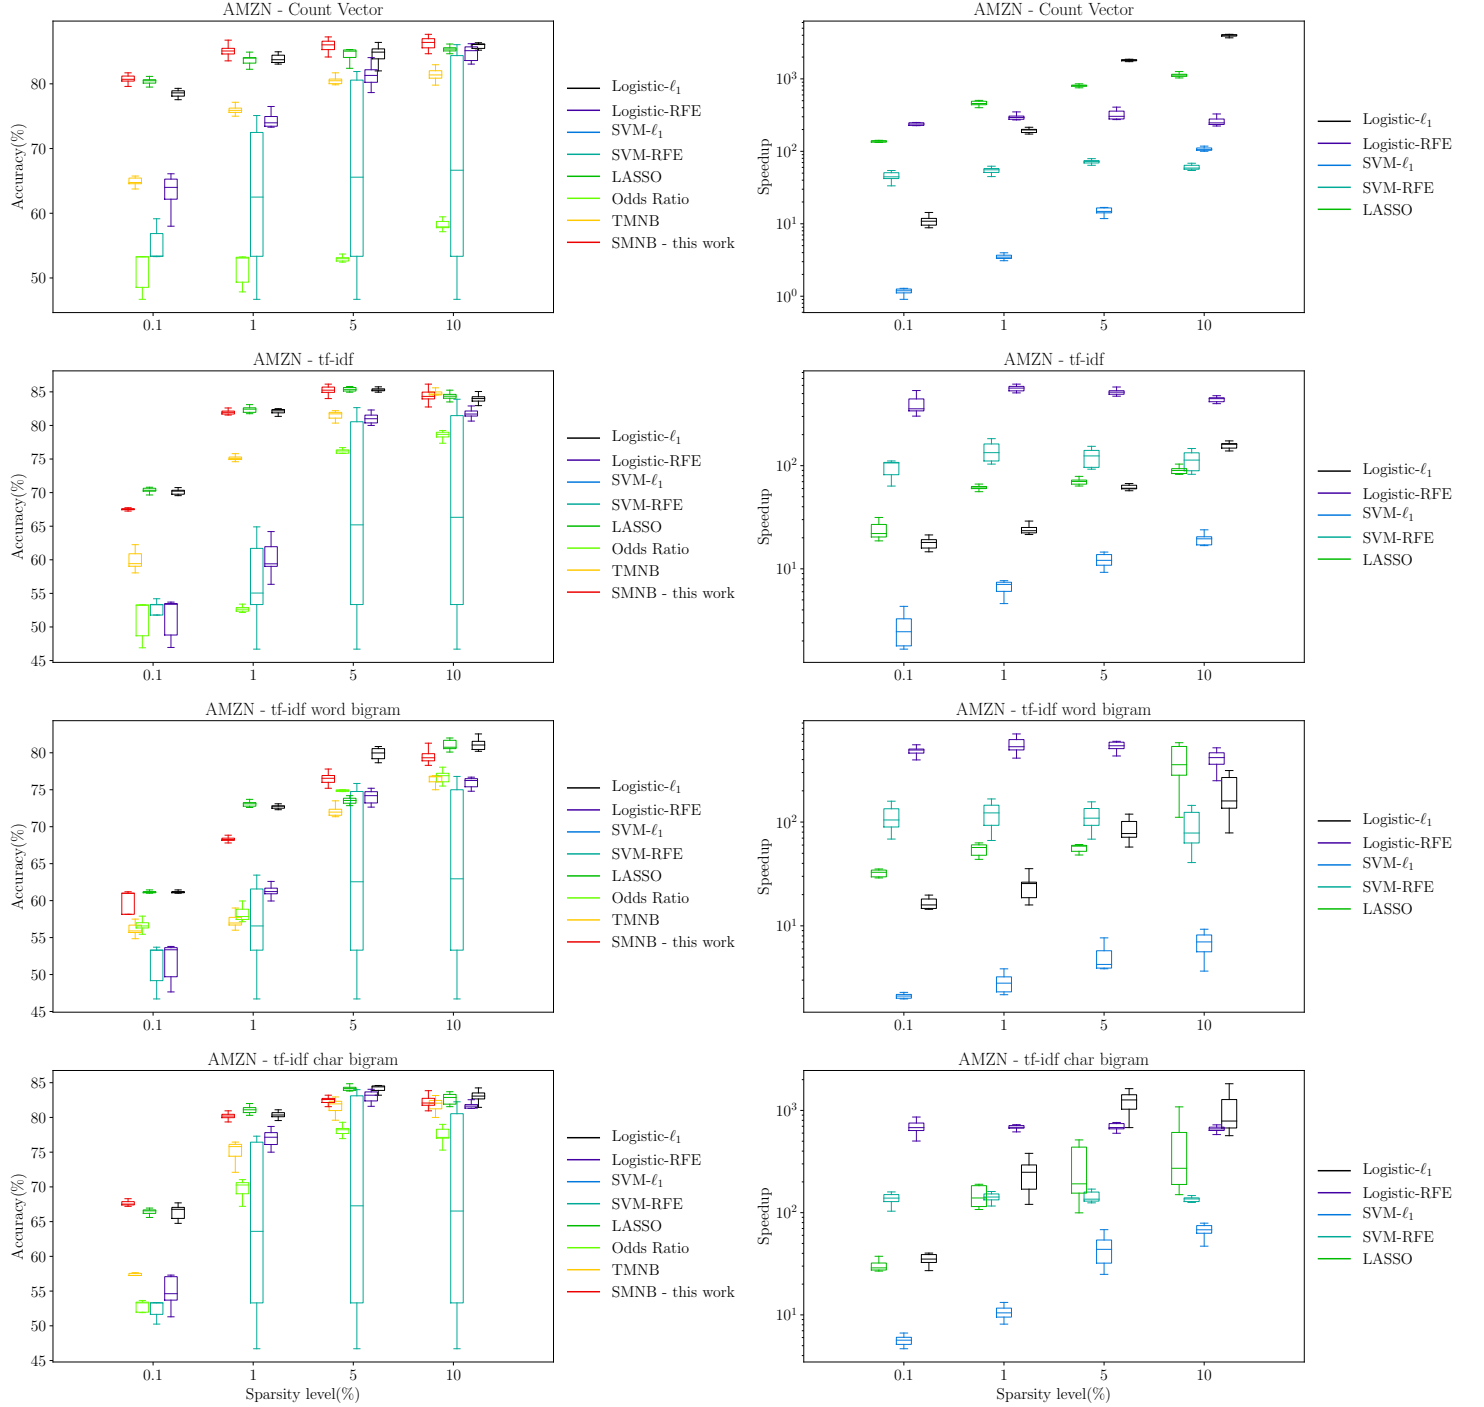

Figure 4: Experiment 2: AMZN - Stage 2 Logistic

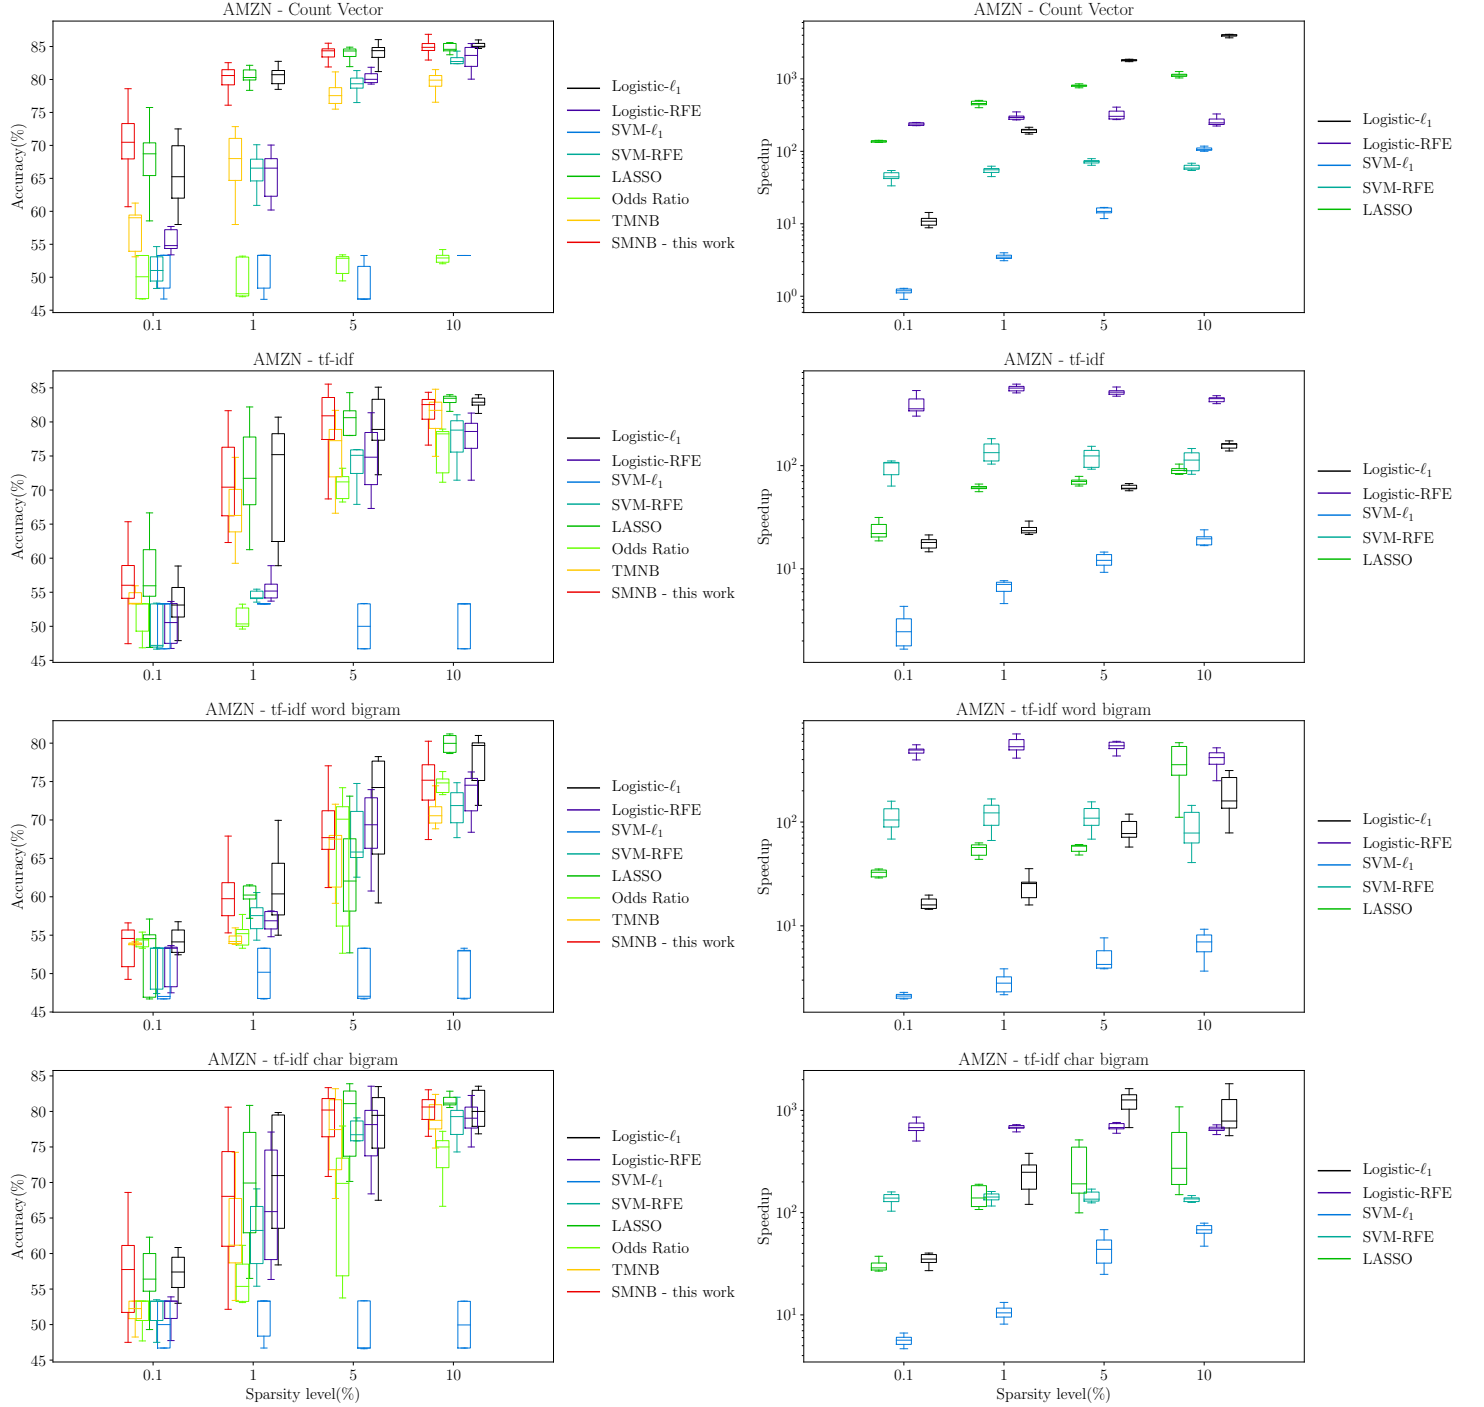

Figure 5: Experiment 2: AMZN - Stage 2 SVM

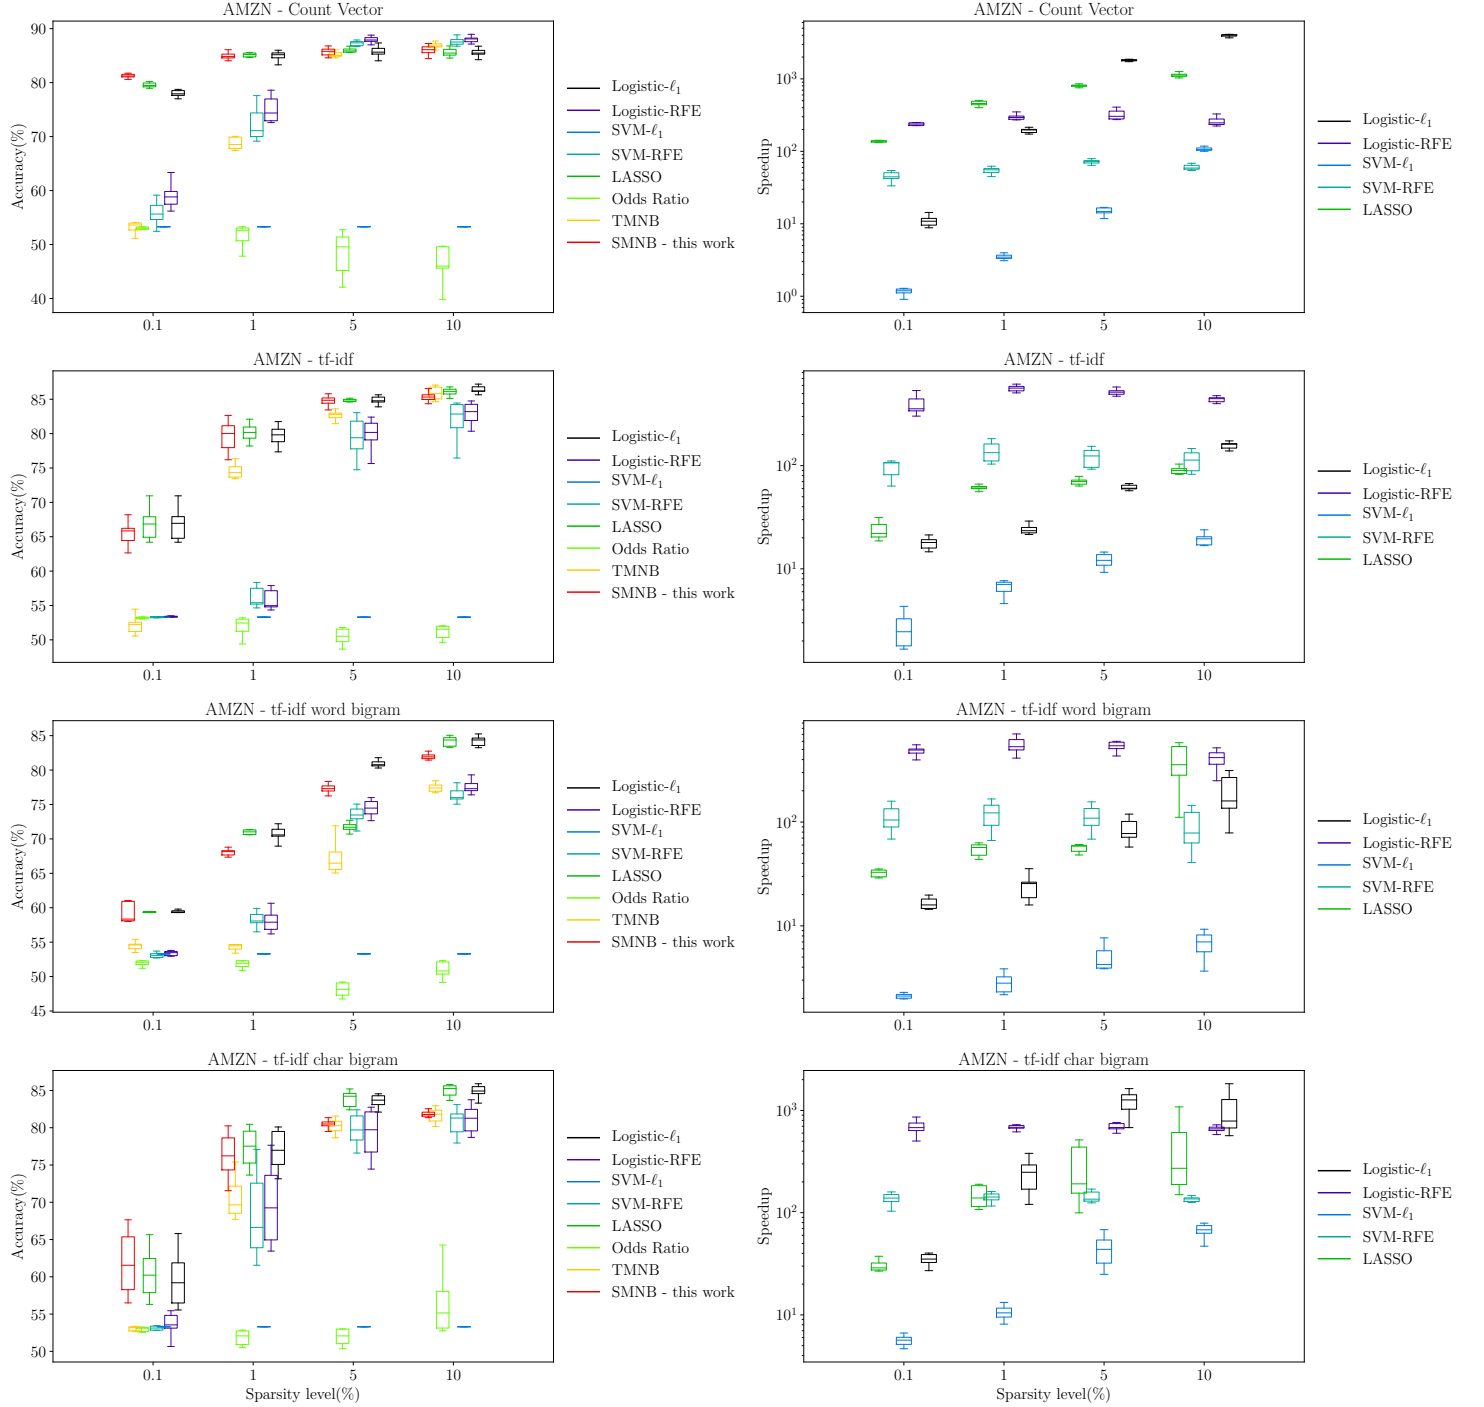

Figure 6: Experiment 2: AMZN - Stage 2 MNB

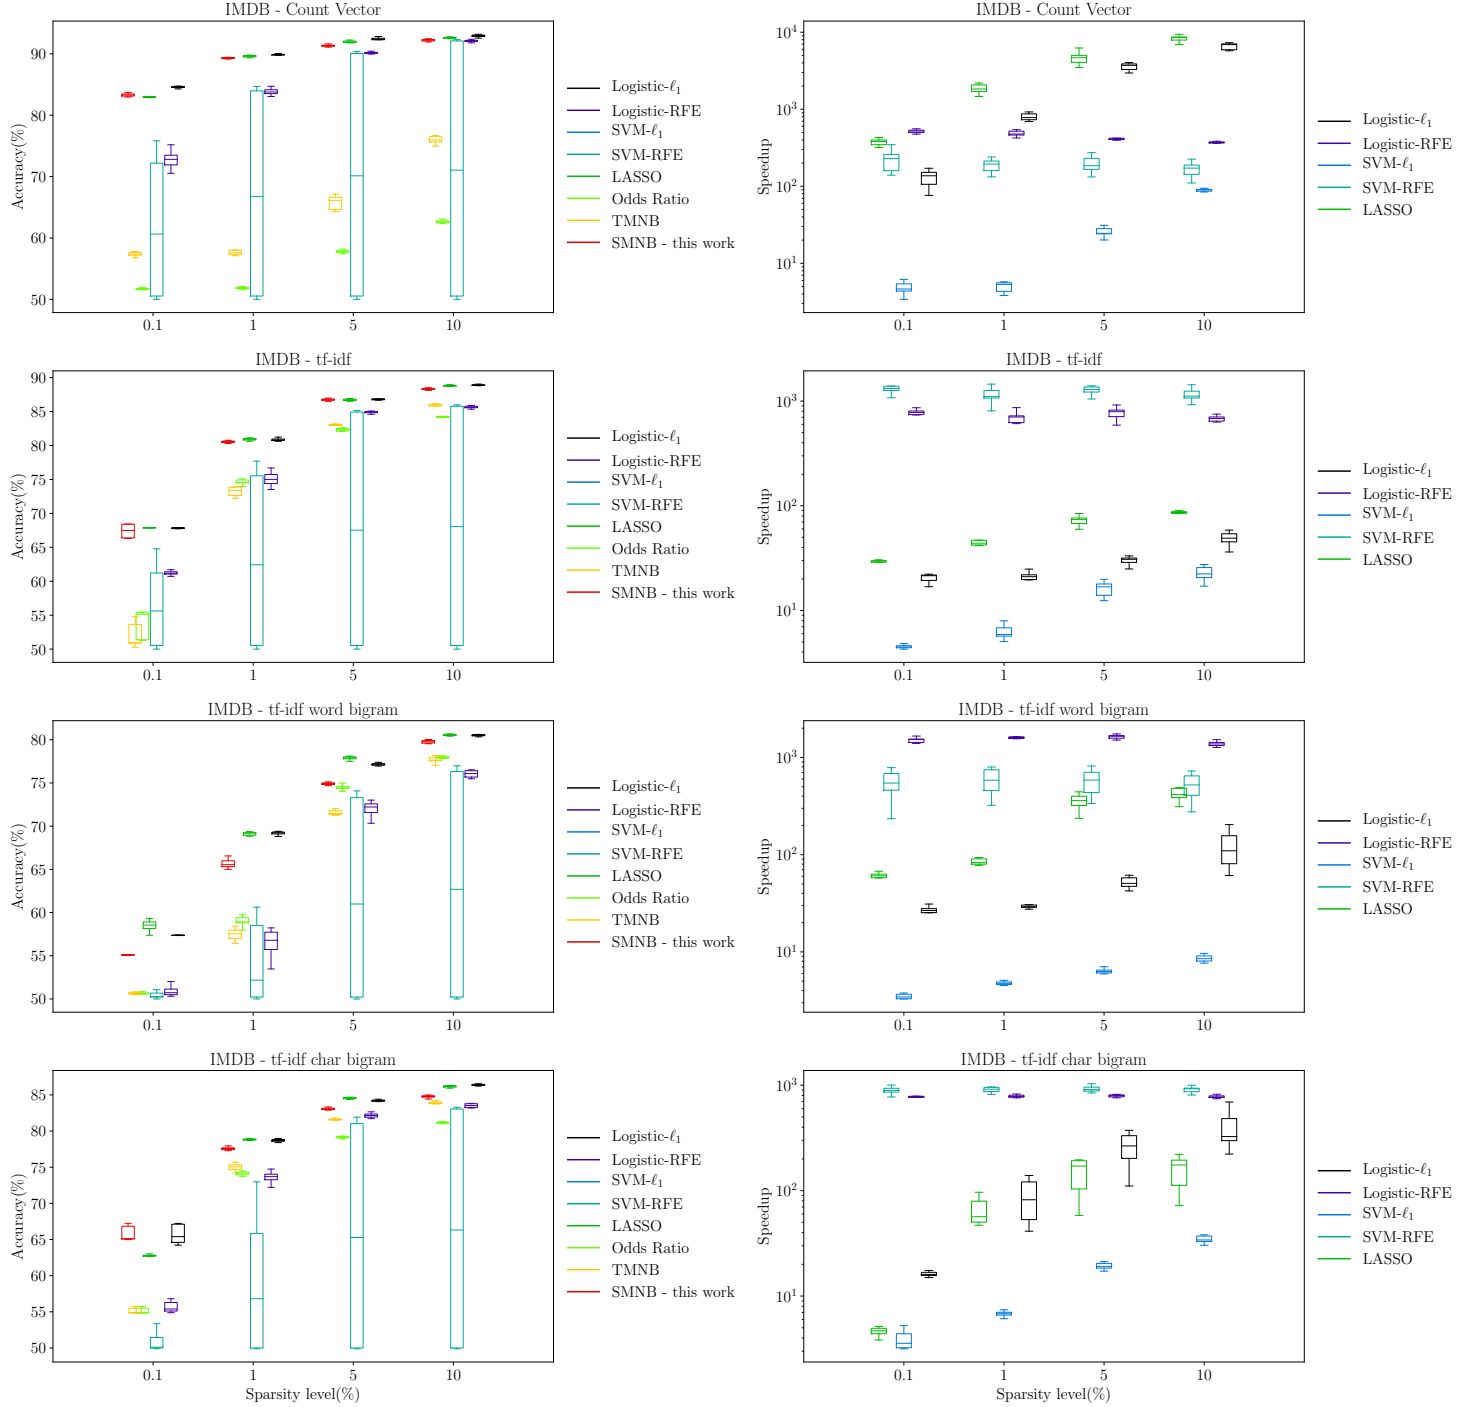

Figure 7: Experiment 2: IMDB - Stage 2 Logistic

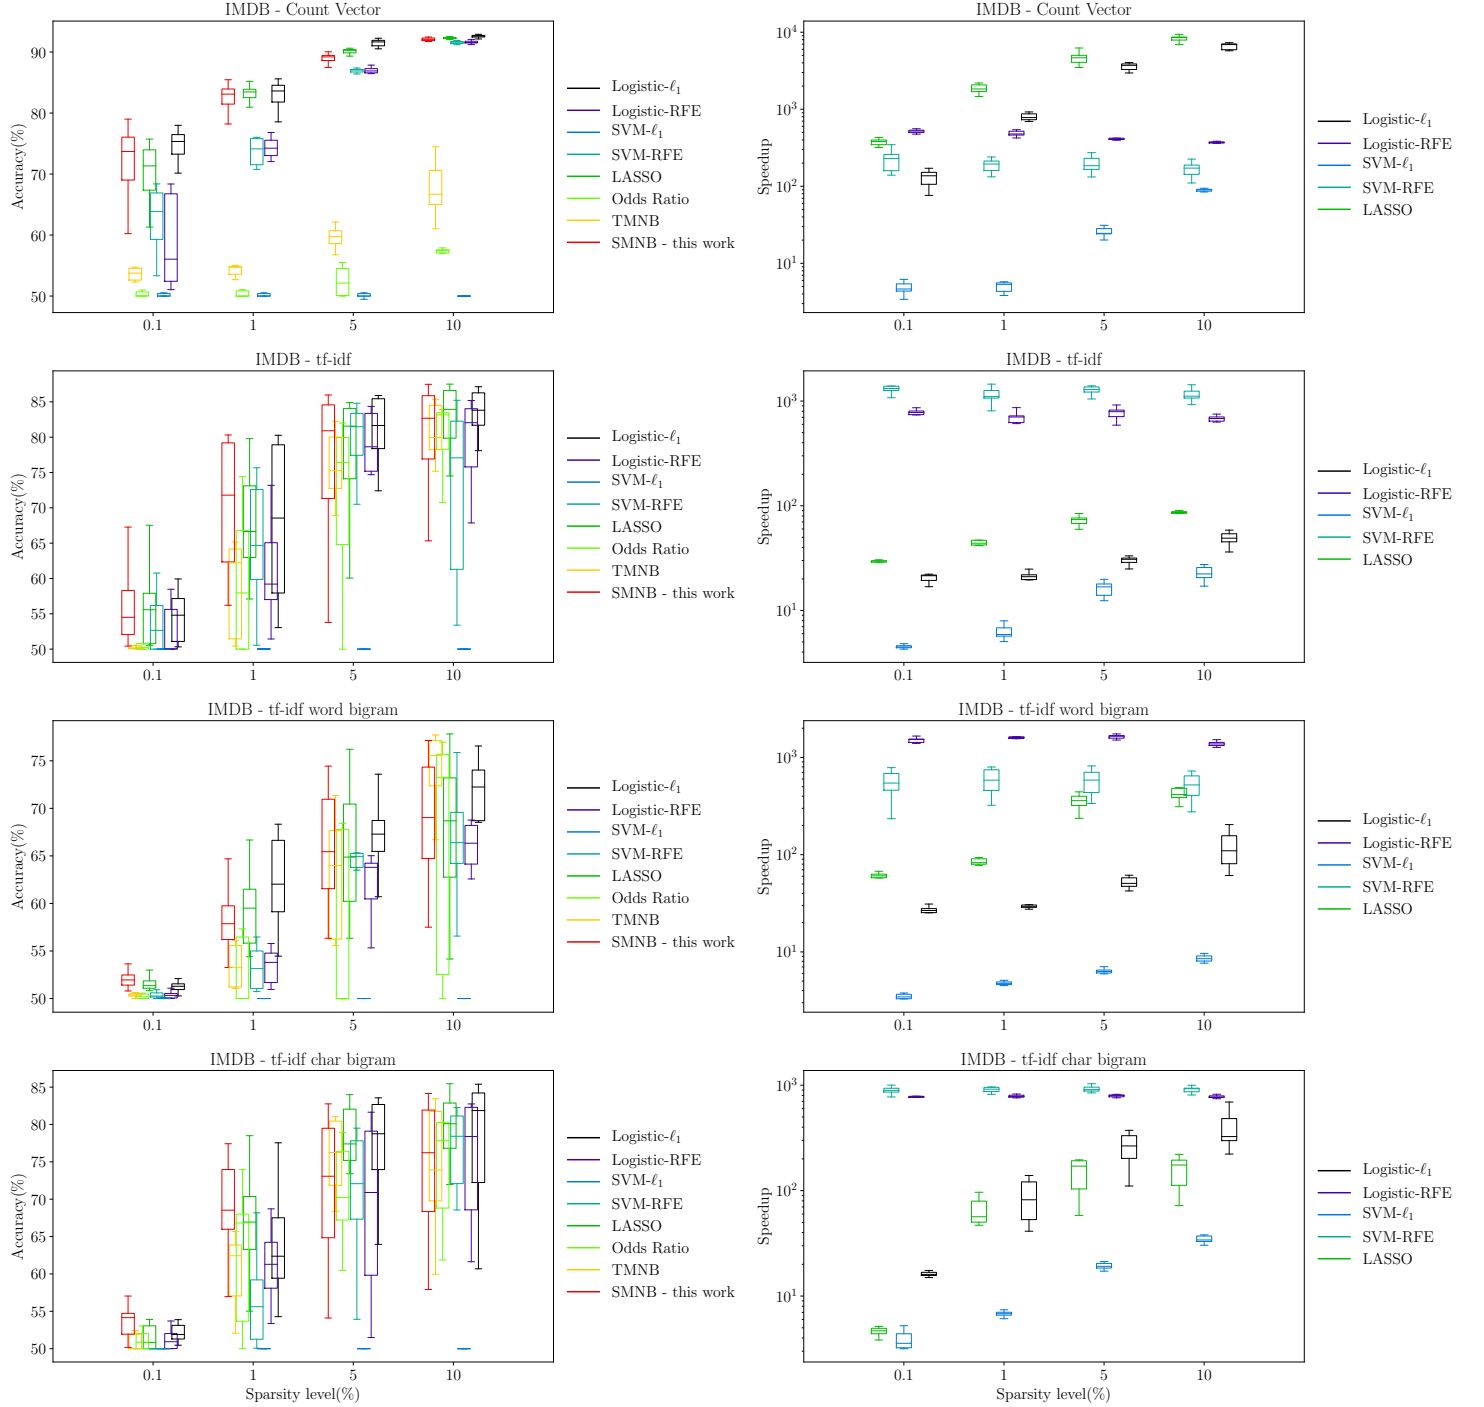

Figure 8: Experiment 2: IMDB - Stage 2 SVM



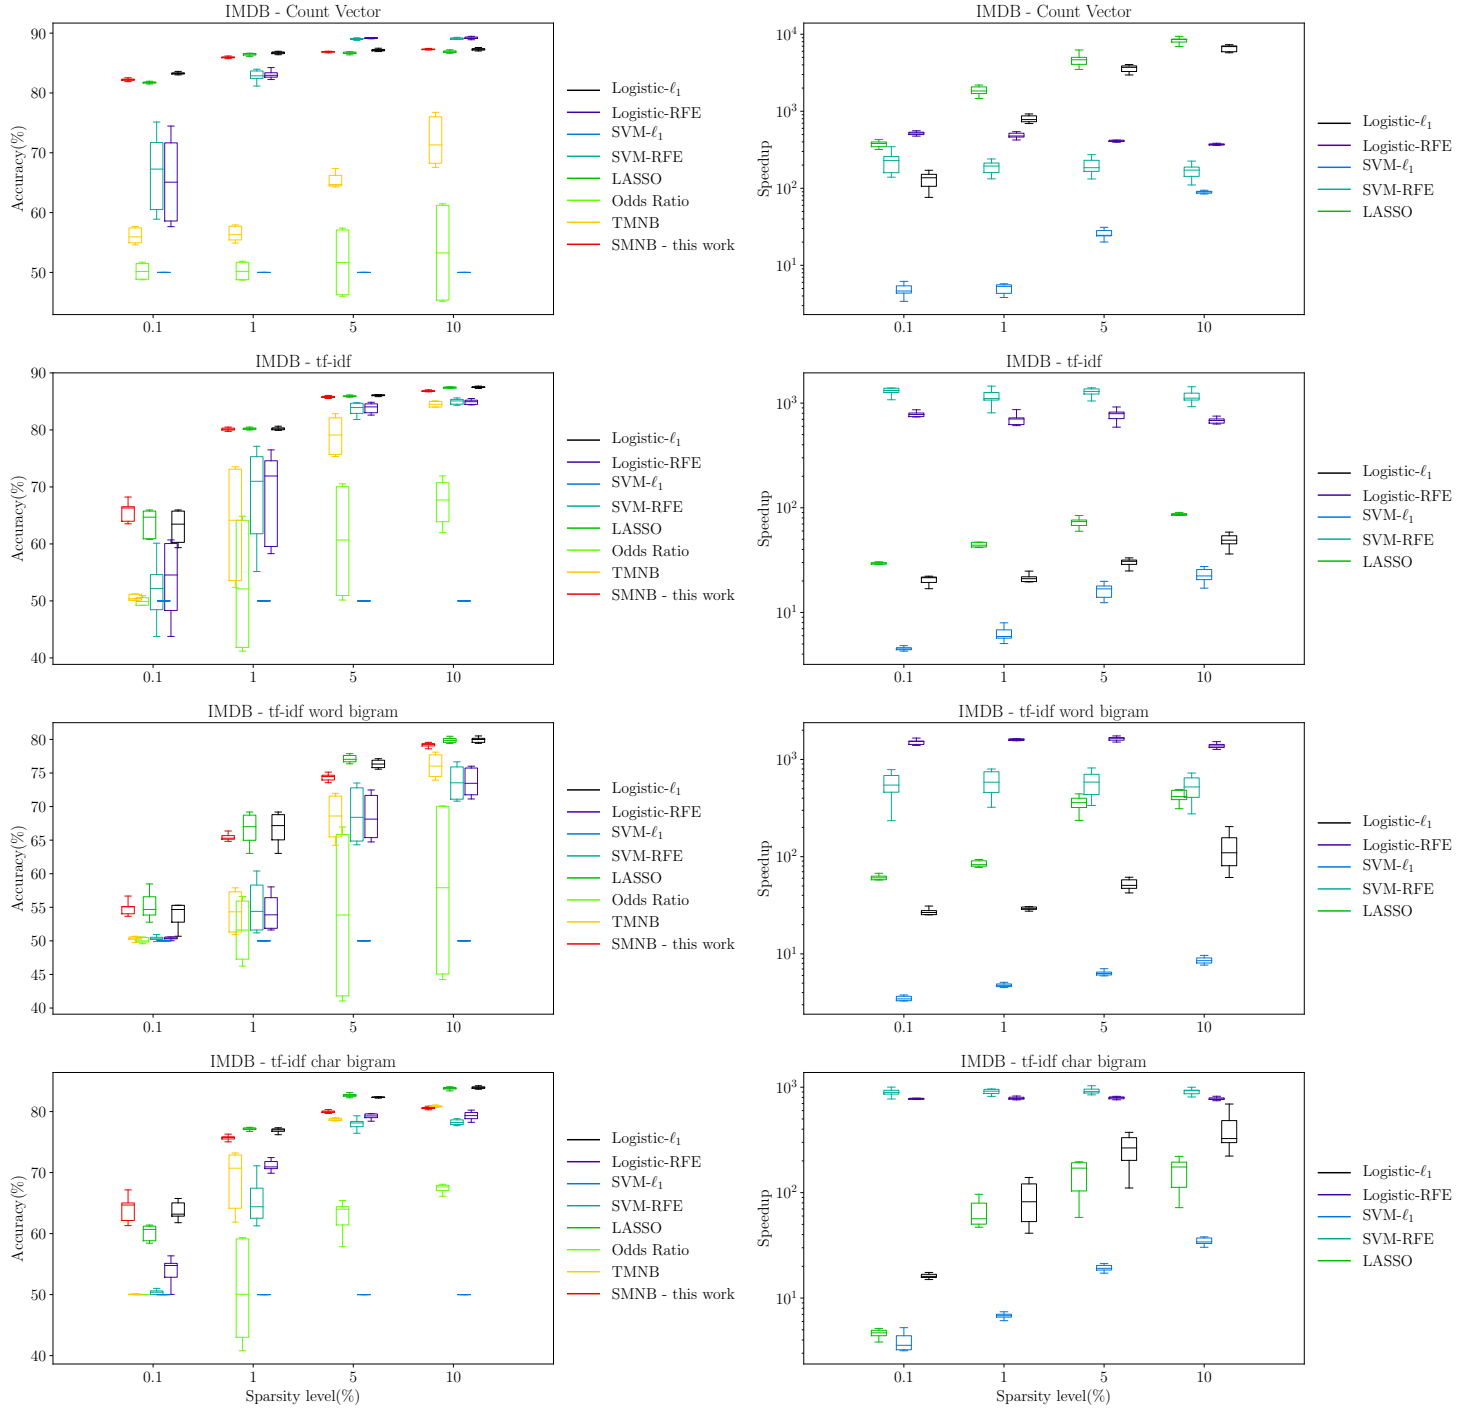

Figure 9: Experiment 2: IMDB - Stage 2 MNB

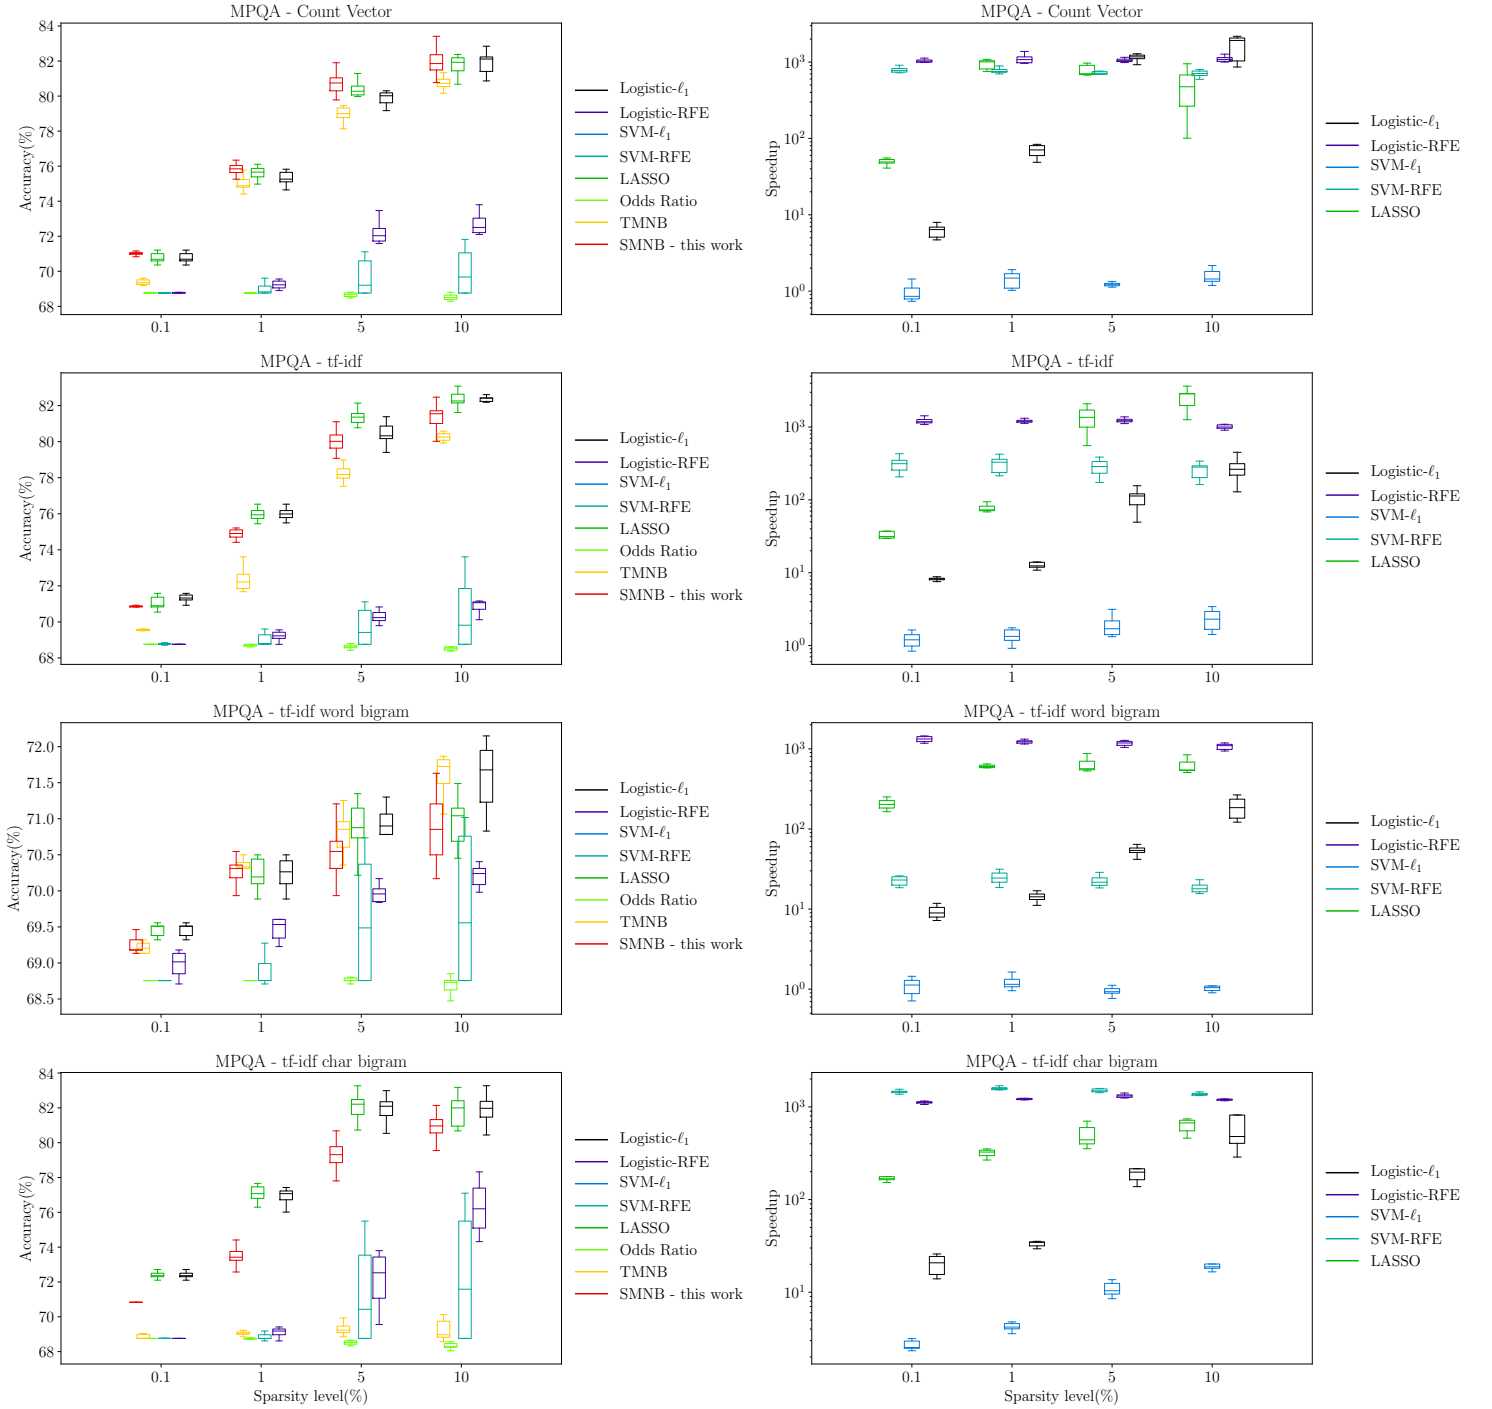

Figure 10: Experiment 2: MPQA - Stage 2 Logistic

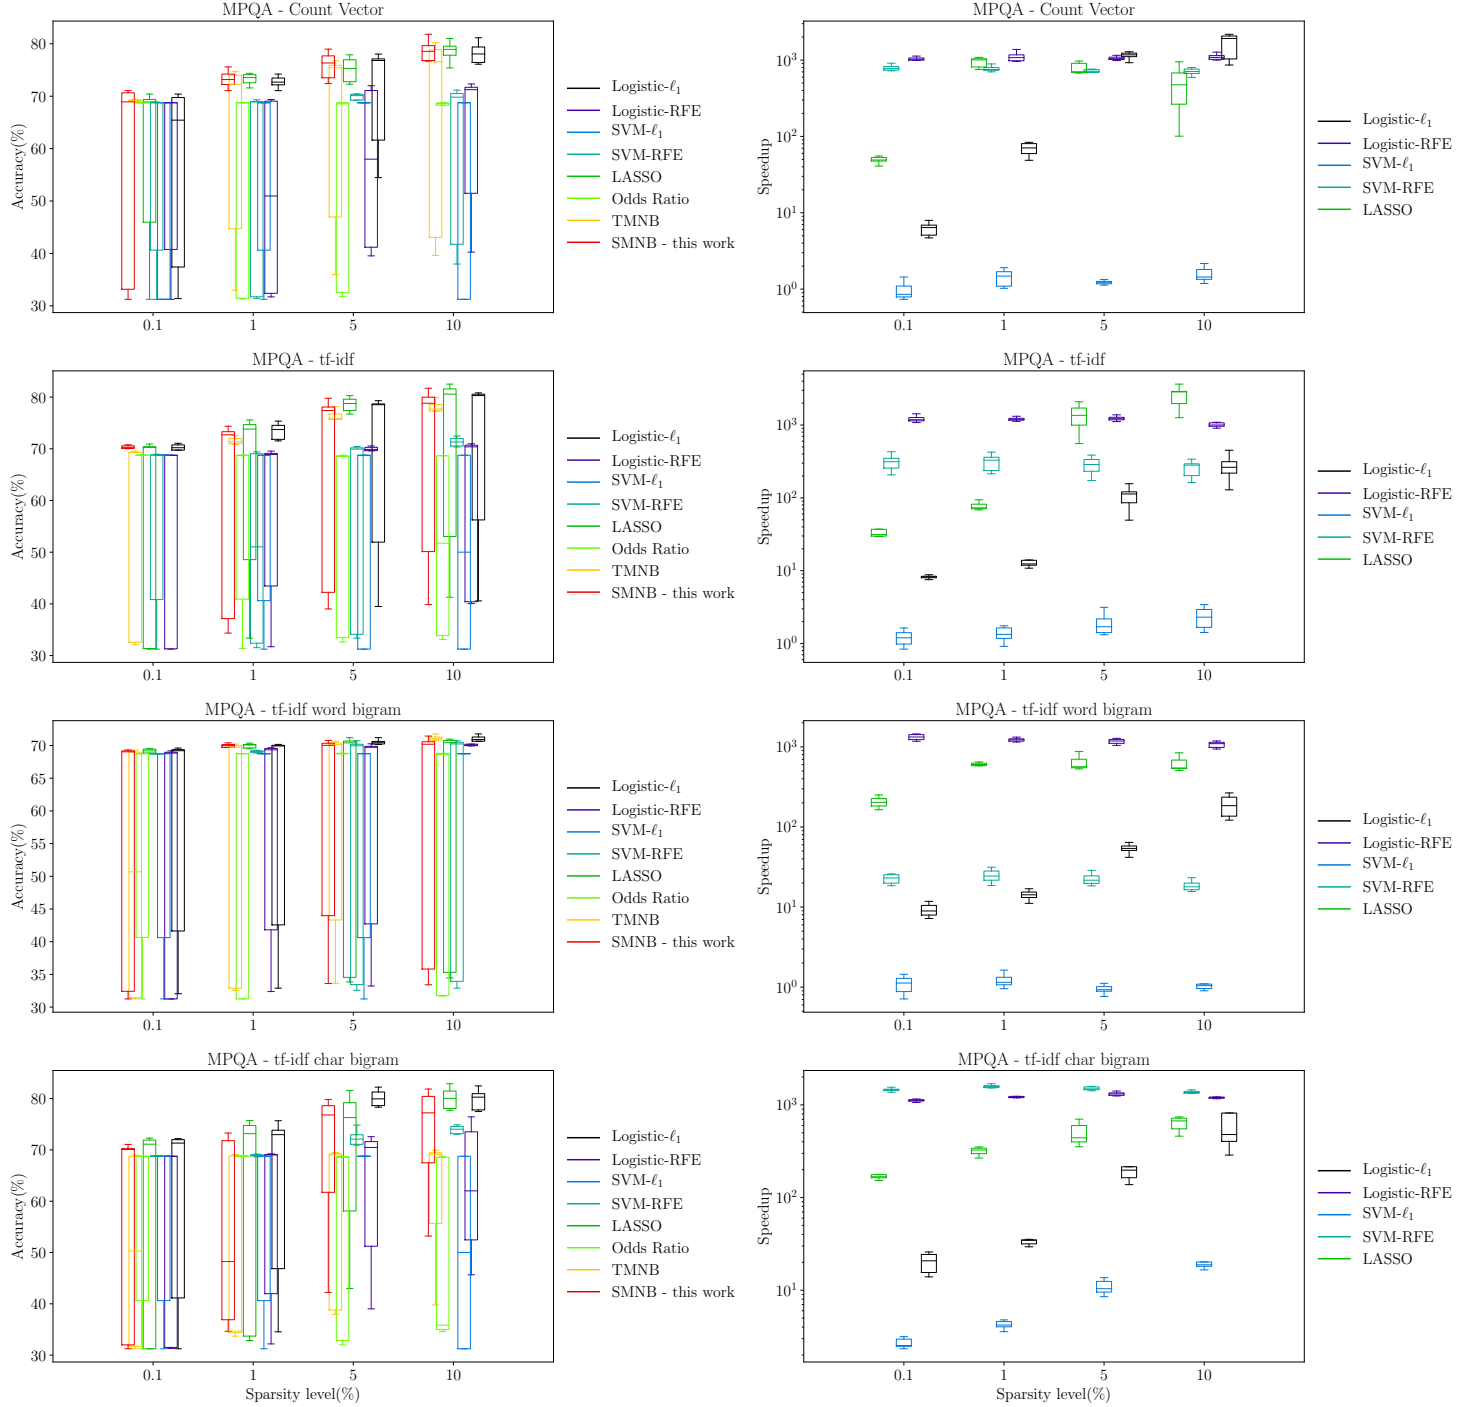

Figure 11: Experiment 2: MPQA - Stage 2 SVM

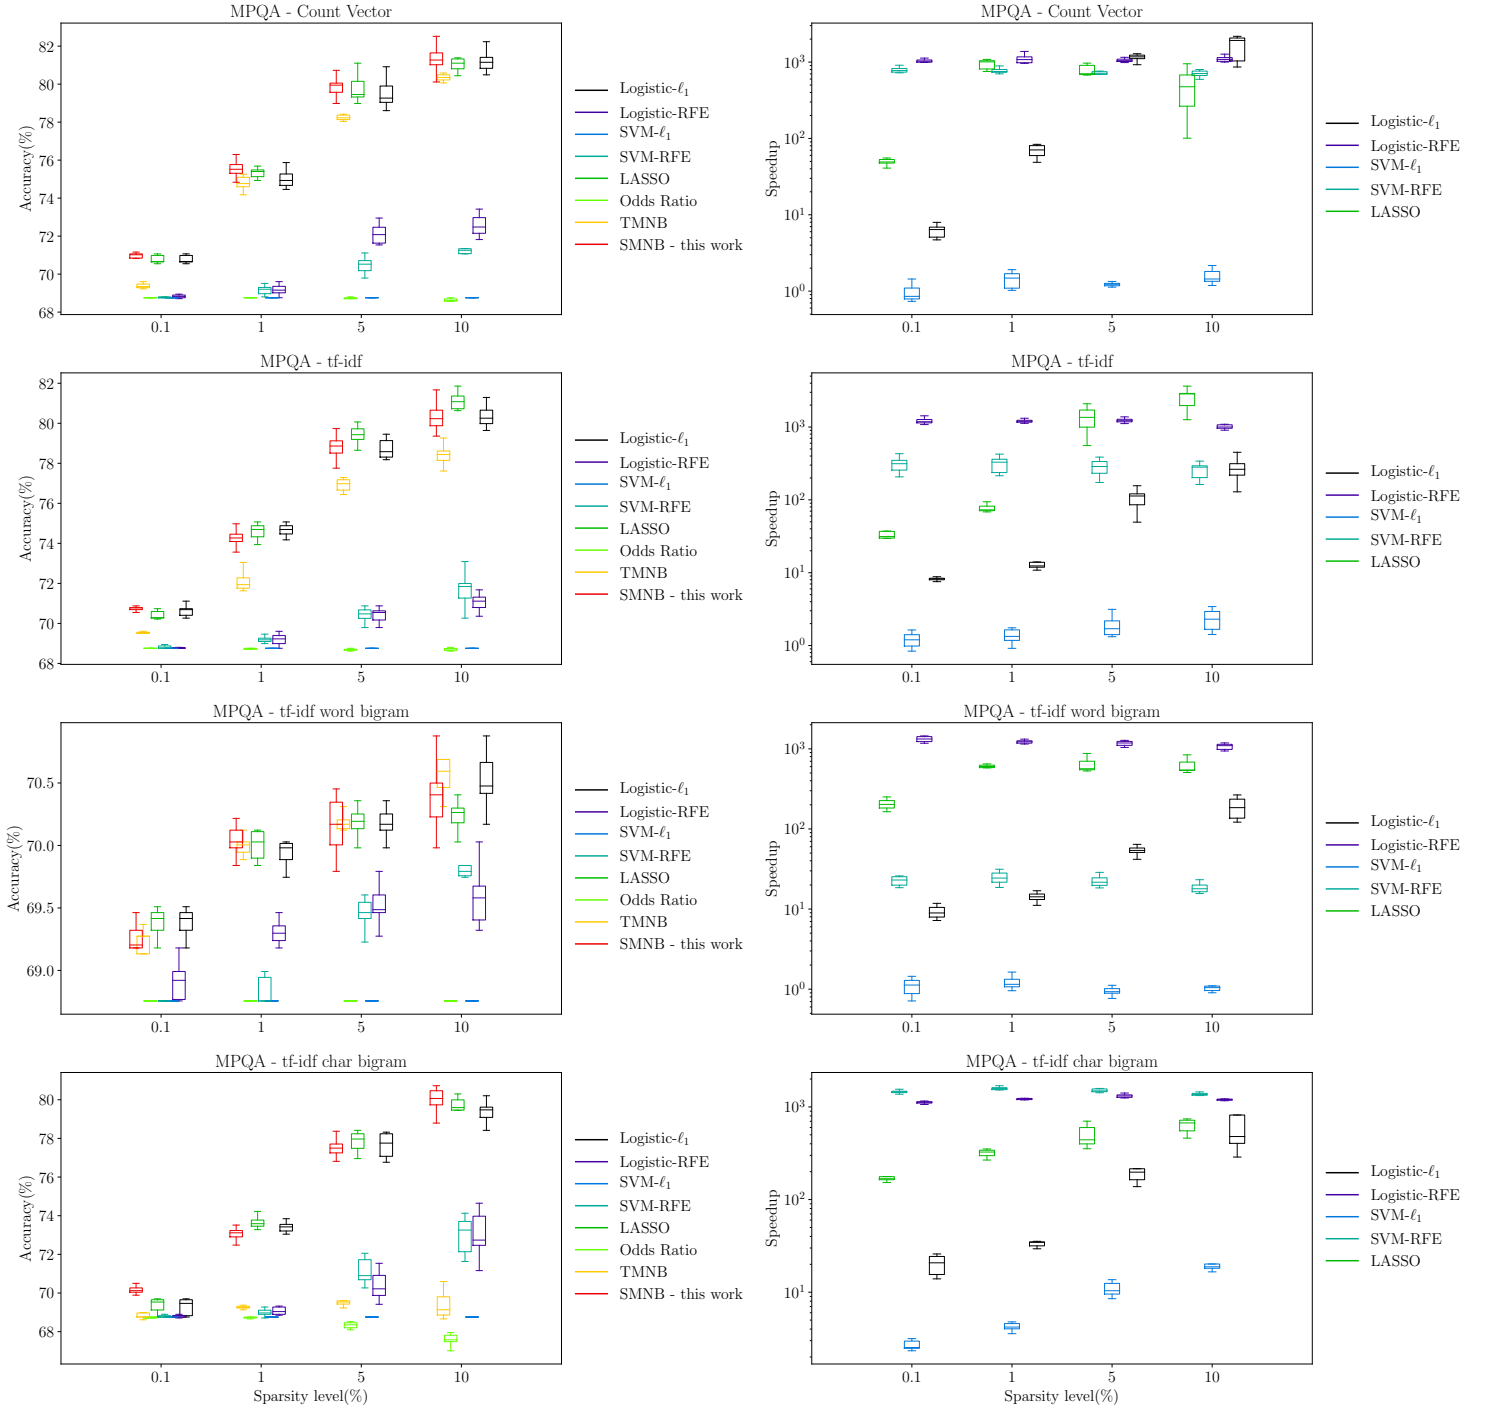

Figure 12: Experiment 2: MPQA - Stage 2 MNB

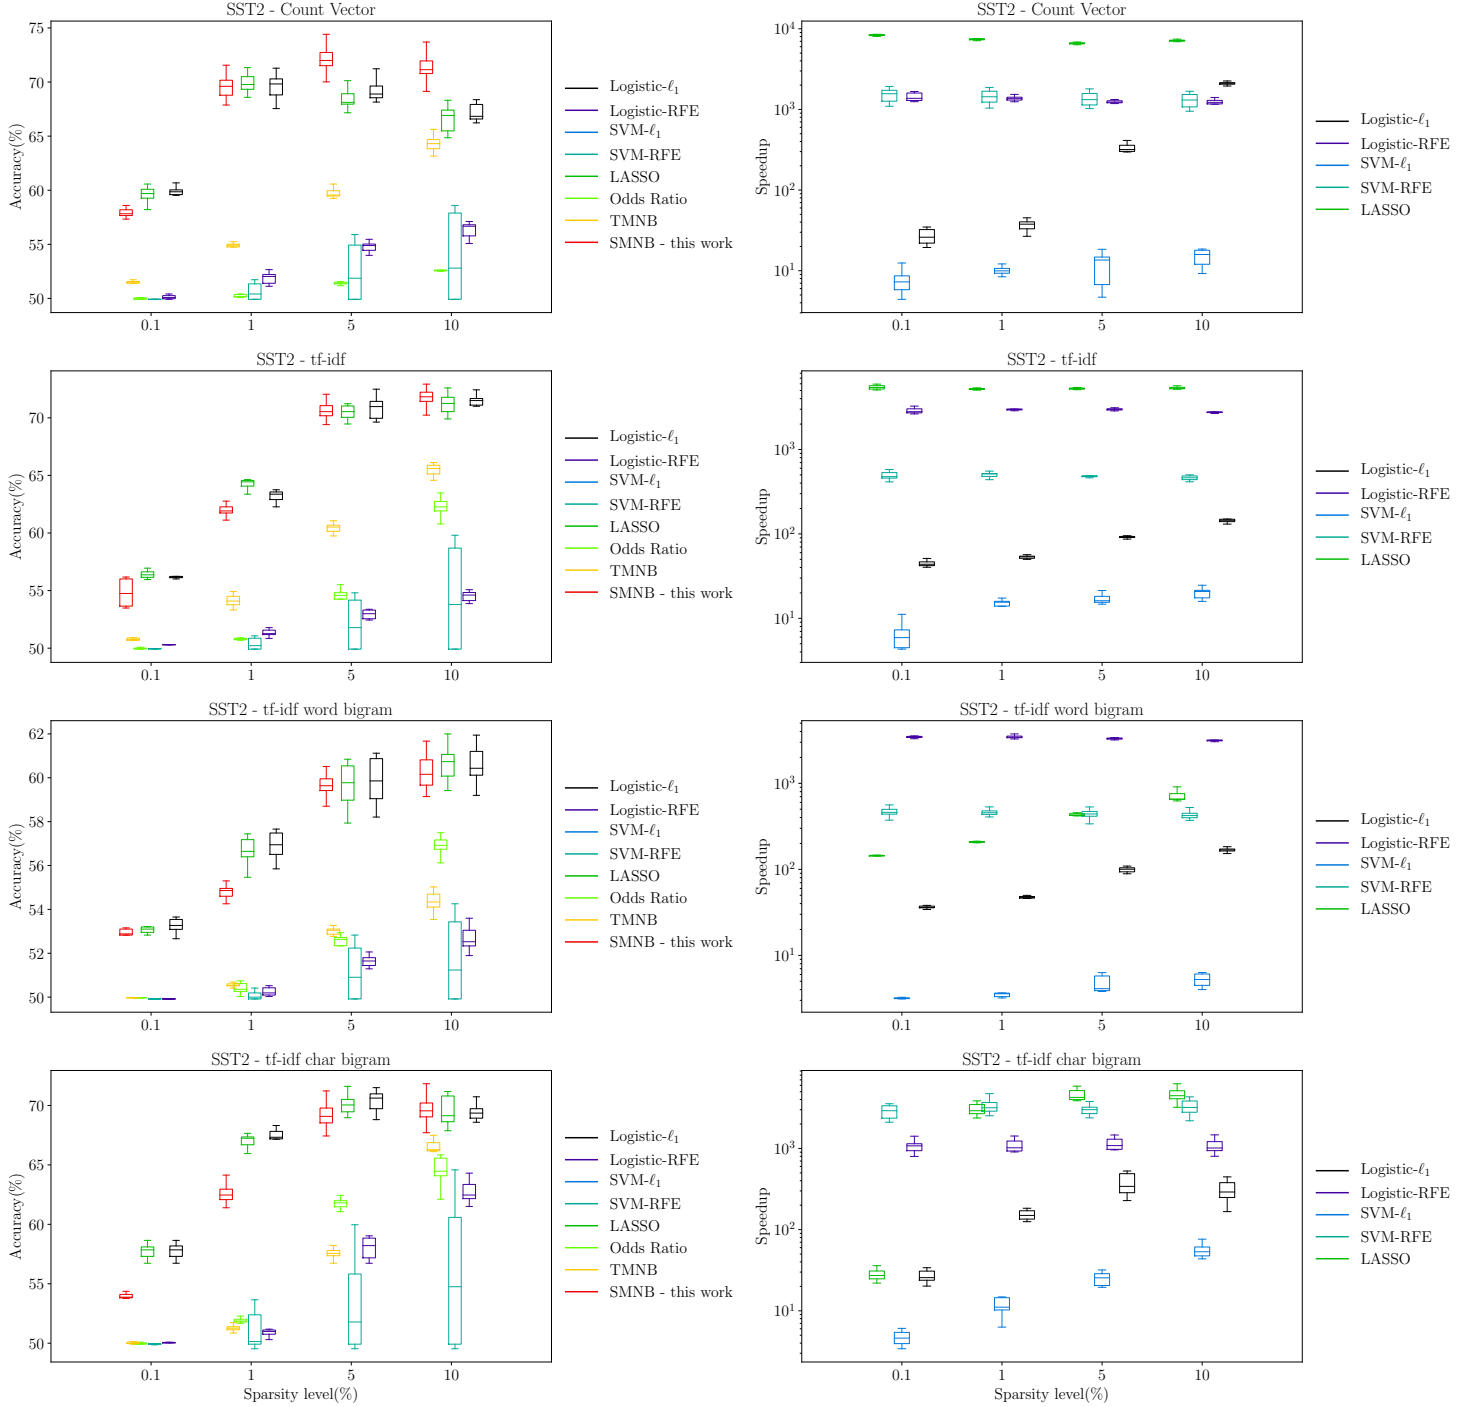

Figure 13: Experiment 2: SST2 - Stage 2 Logistic

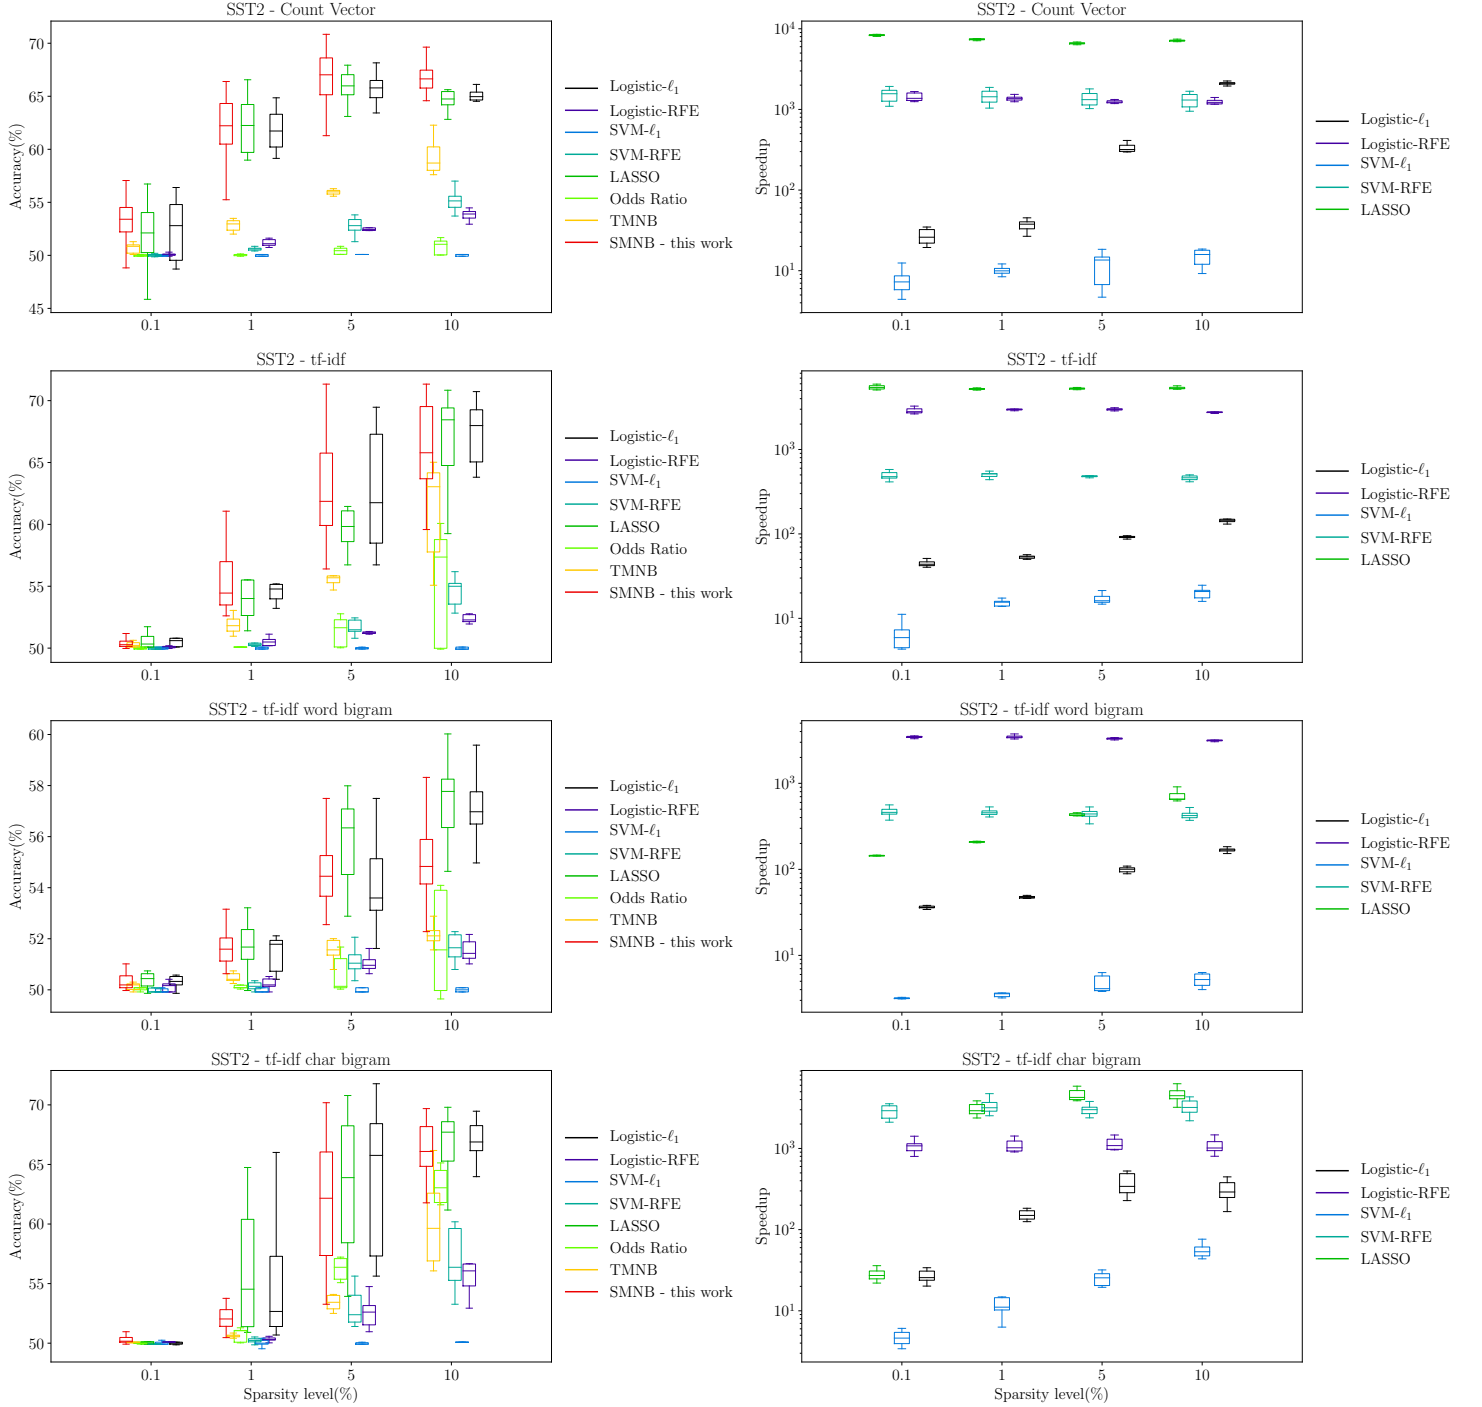

Figure 14: Experiment 2: SST2 - Stage 2 SVM

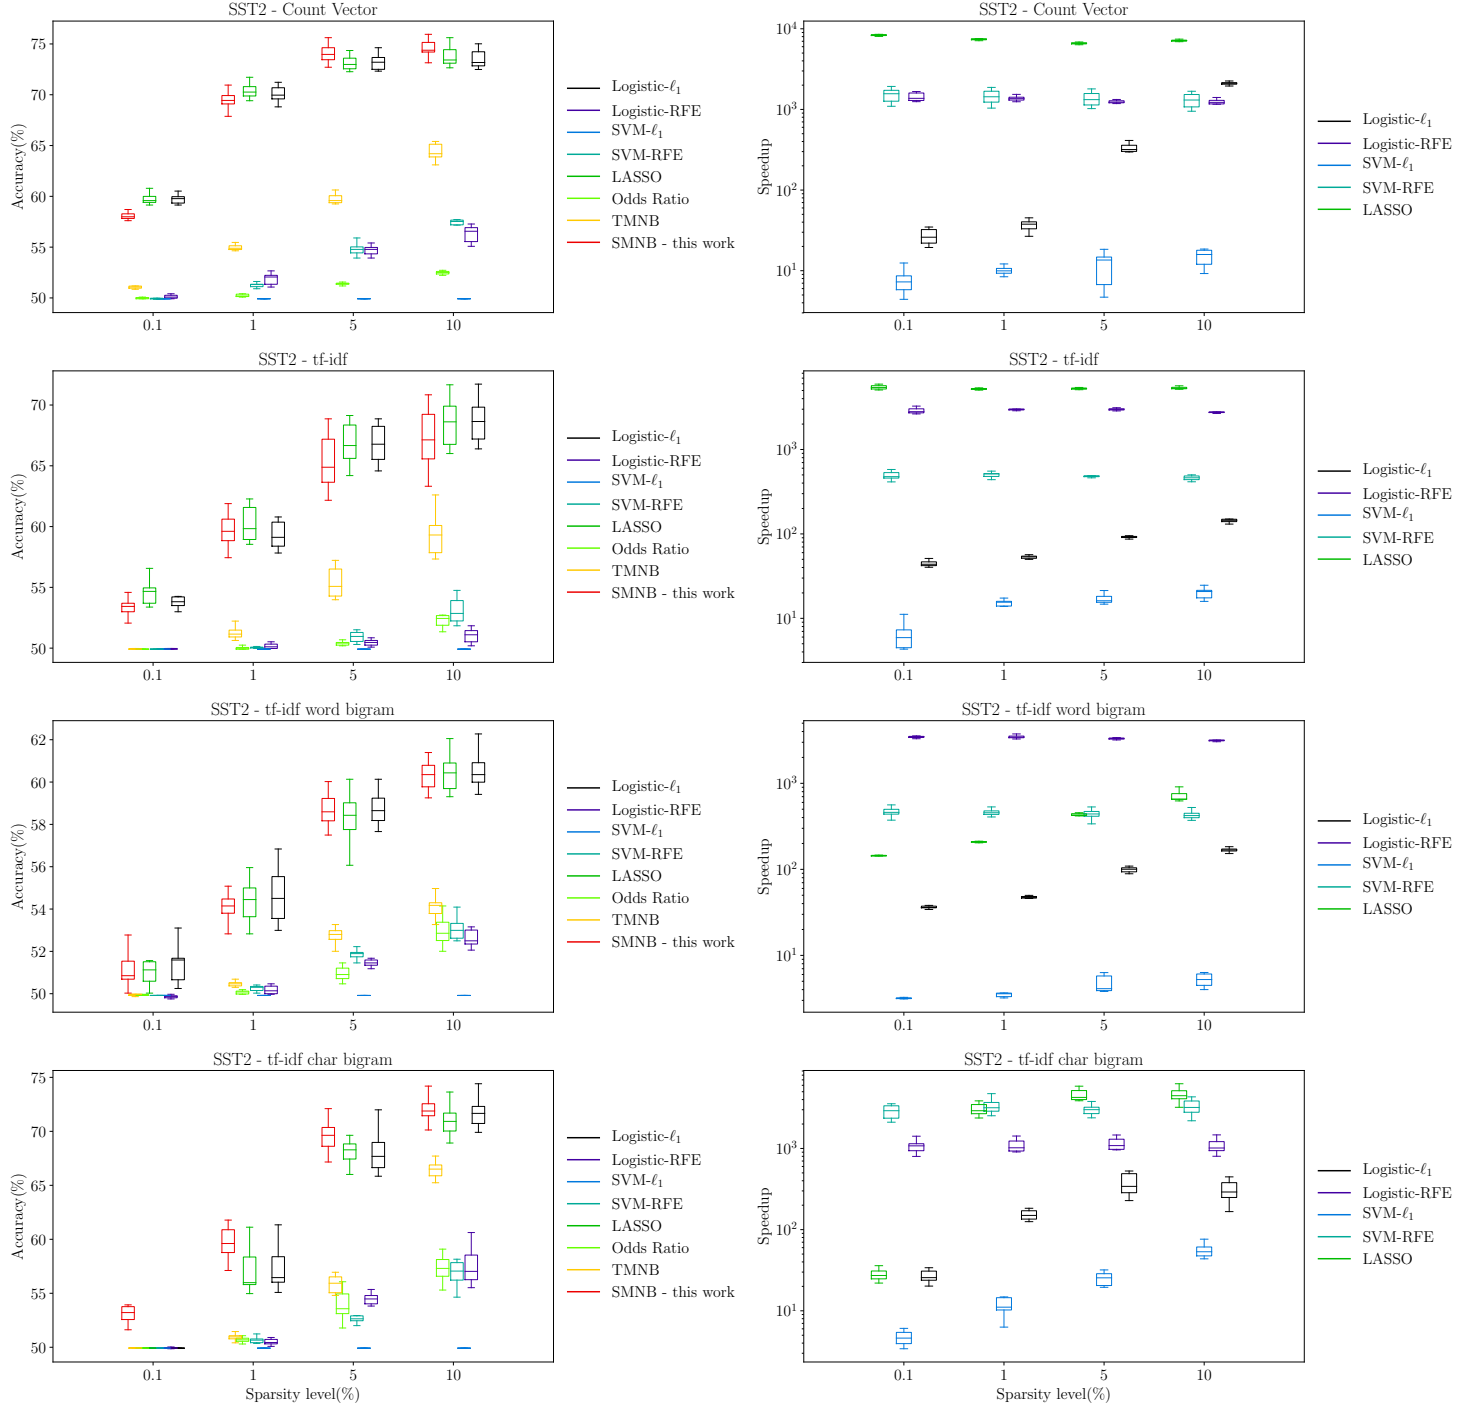

Figure 15: Experiment 2: SST2 - Stage 2 MNB

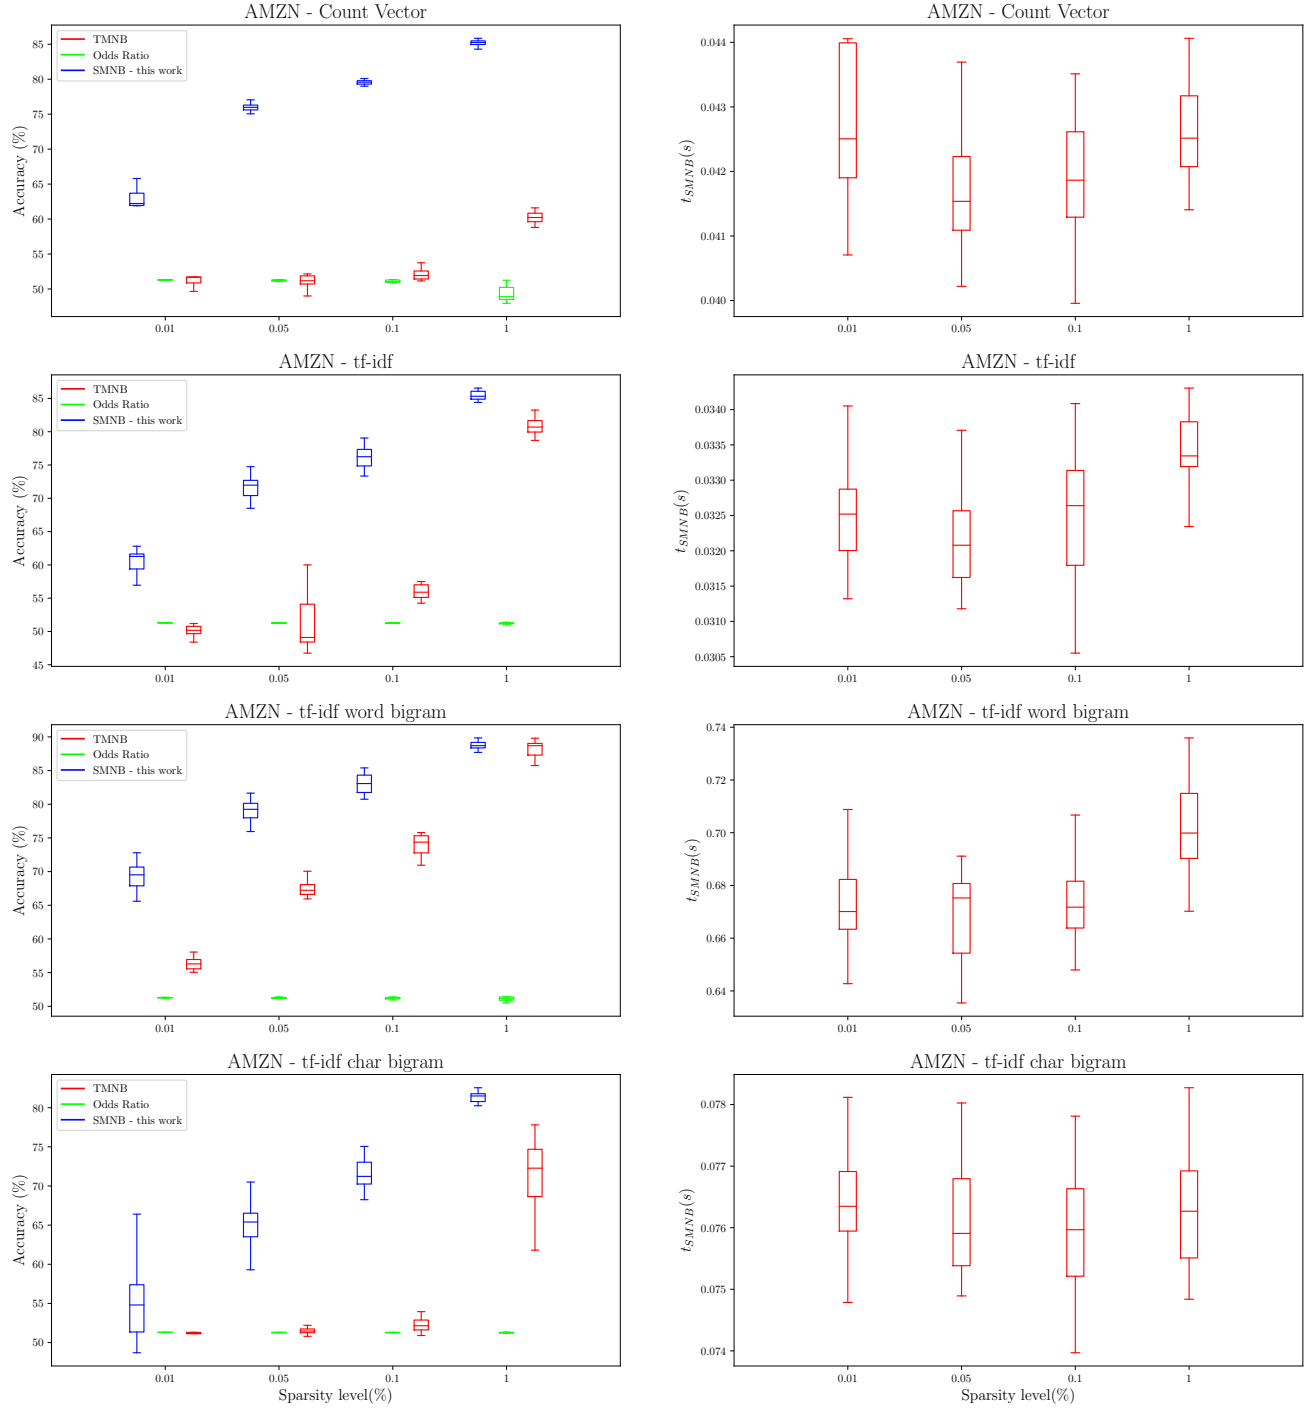

Figure 16: Experiment 3: AMZN - Stage 2 MNB



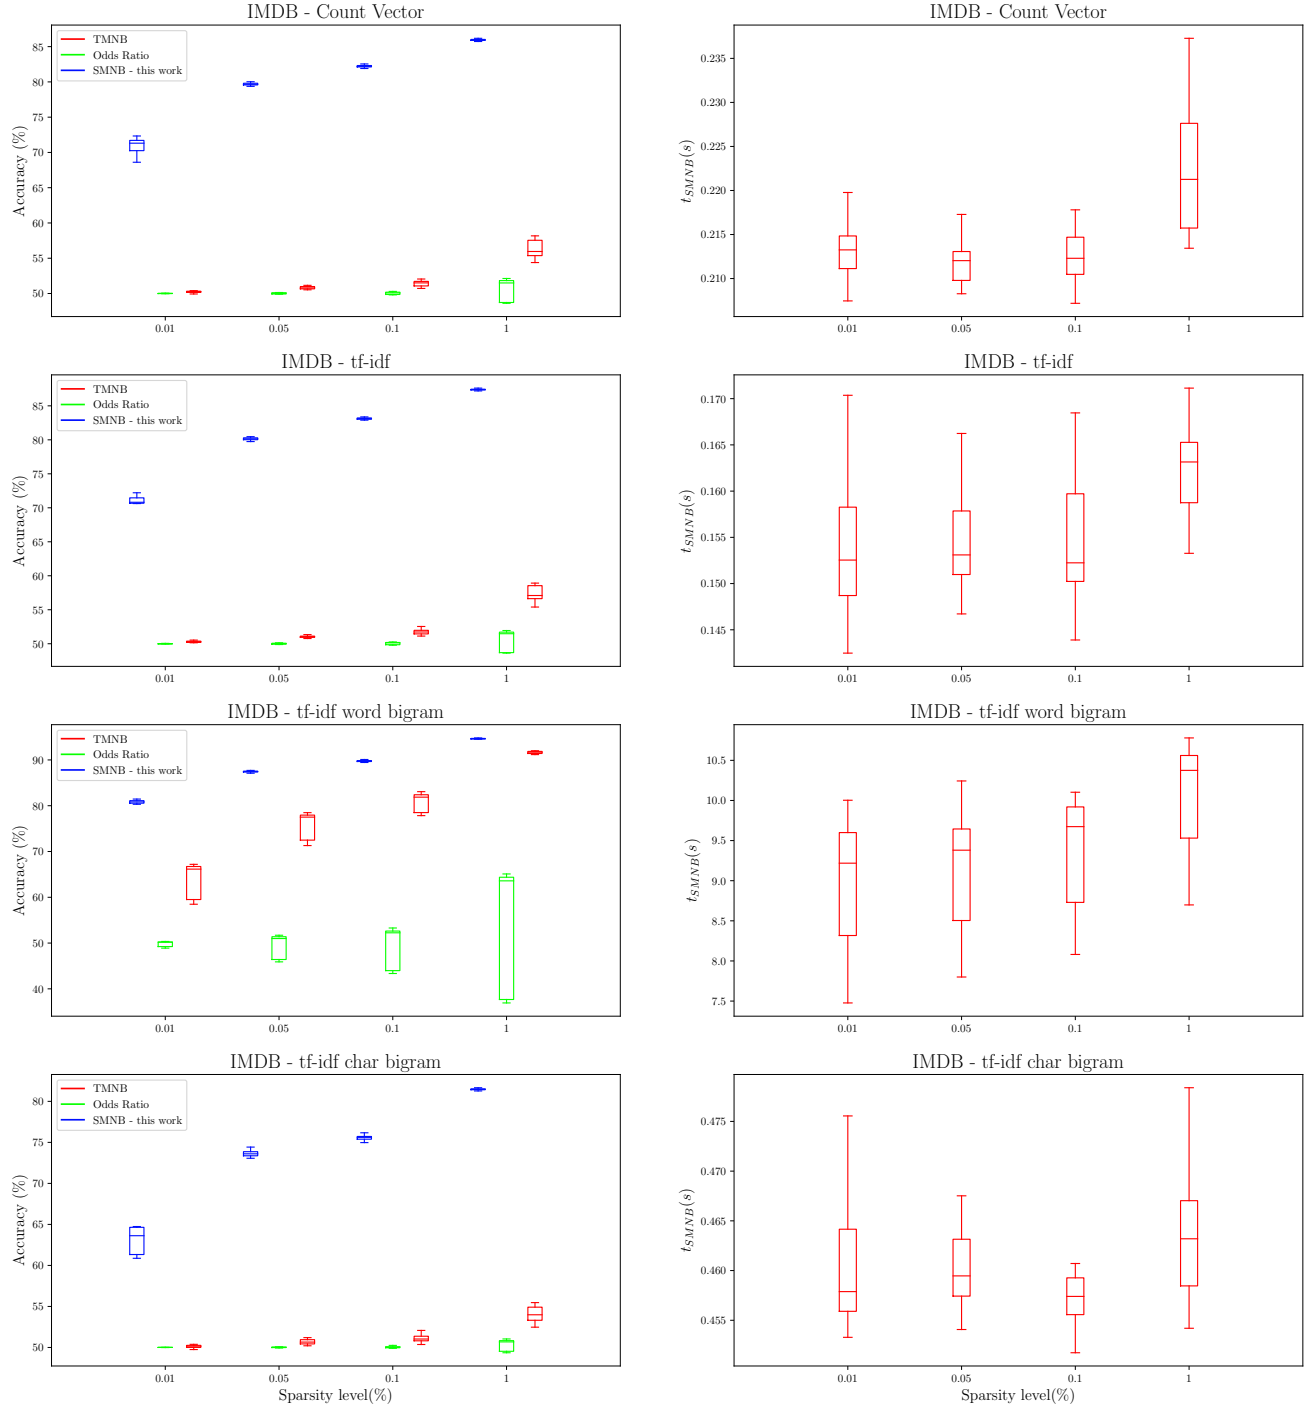

Figure 17: Experiment 3: IMDB - Stage 2 MNB

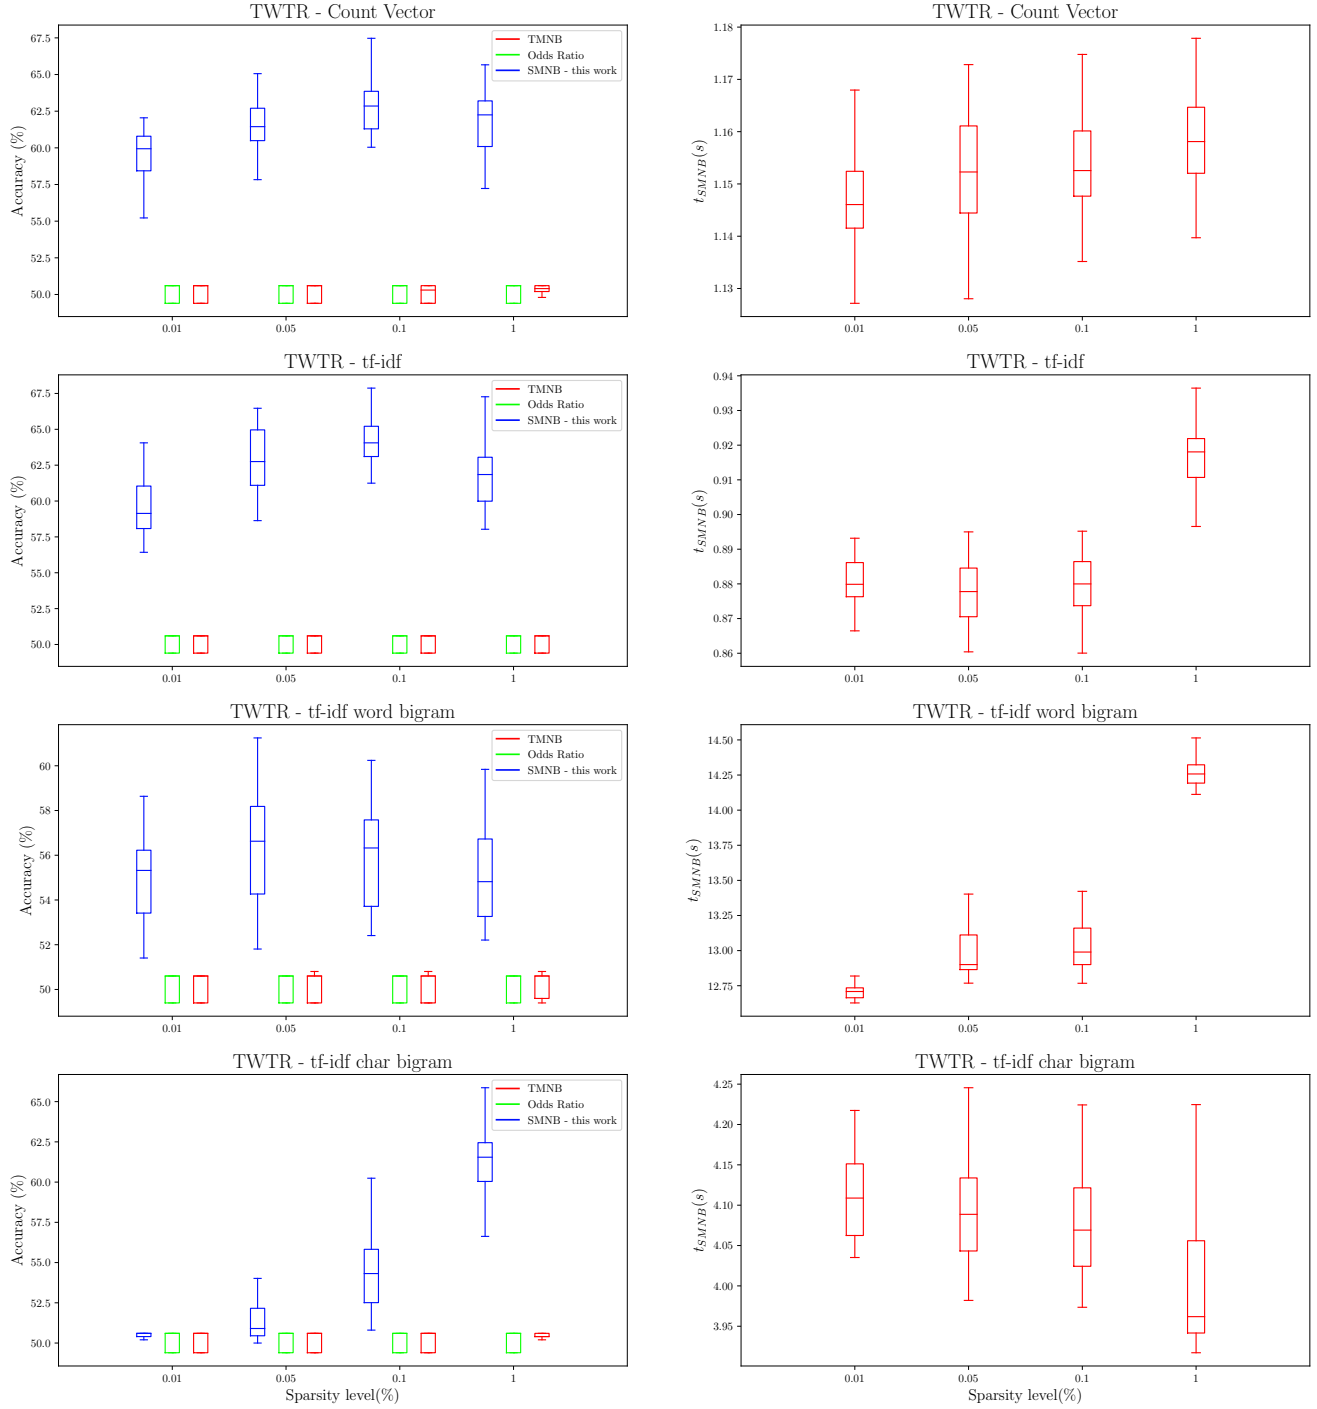

Figure 18: Experiment 3: TWTR - Stage 2 MNB

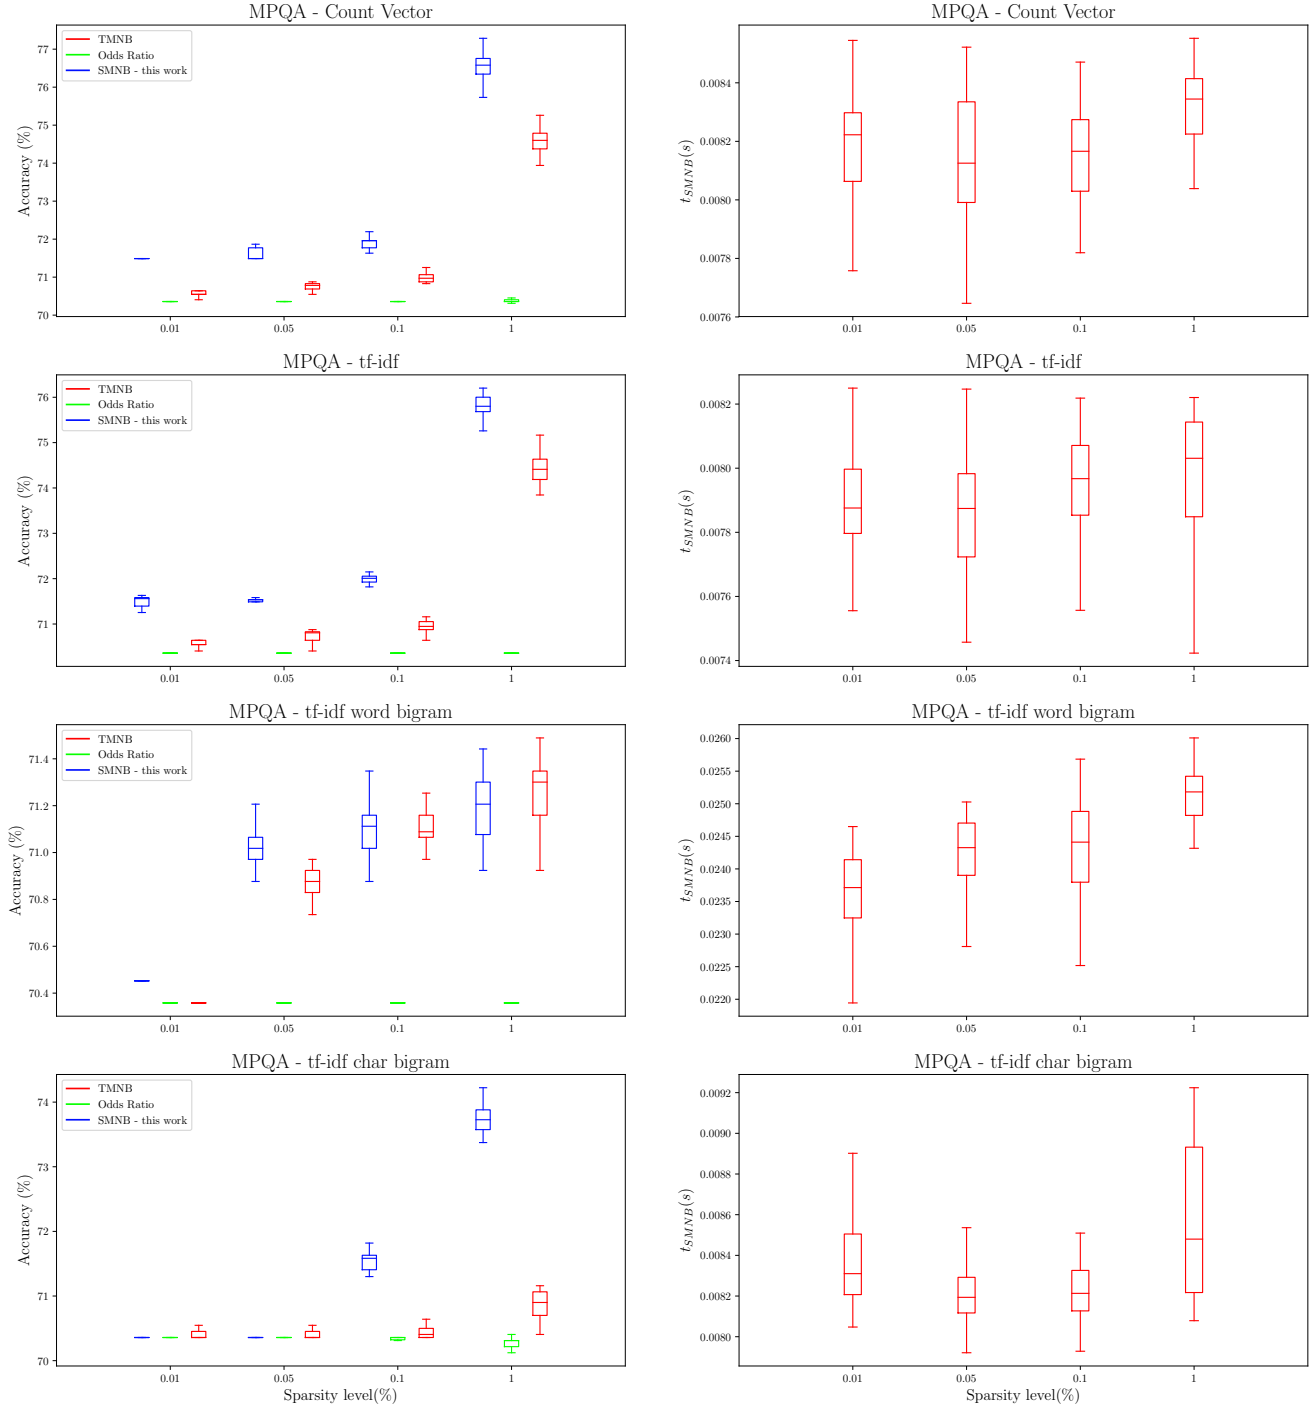

Figure 19: Experiment 3: MPQA - Stage 2 MNB

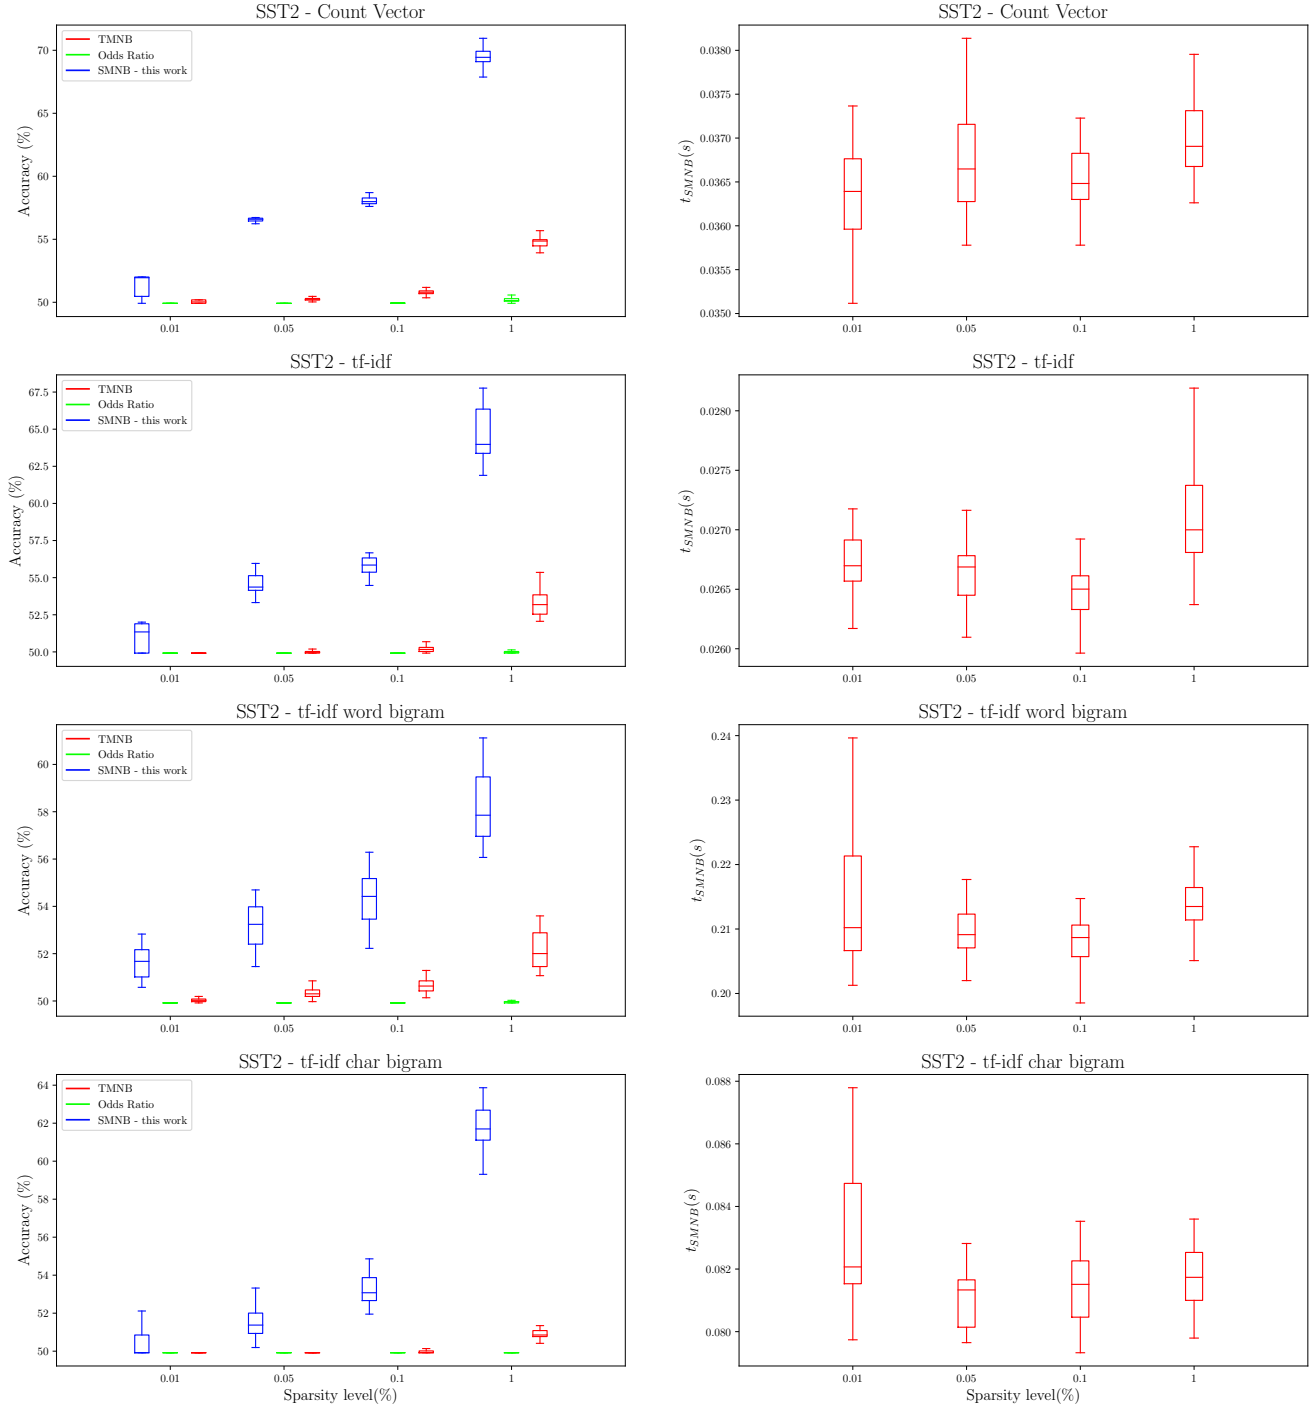

Figure 20: Experiment 3: SST2 - Stage 2 MNB
